# Supplementary material for: Quantitative Structure–Activity Relationship Evaluation of MDA-MB-231 Cell Anti-Proliferative Leads
Source: MDPI journal article supplement (doi:10.3390/molecules26164795), 2021-08-07
Supplement: s1 [file s1]

# Quantitative Structure Activity Relationship Evaluation of MDA-MB-231 cell Anti-Proliferative Leads

## ➤ Supplementary Information:

**Table S1:** Details regarding performance of model 1.1.

| ID | Status     | Exp. endpoint | Pred. by model eq. | Pred. Mod. Eq. Res. | Pred. LOO | Pred. LOO Res. | HAT i/i (h*=0.1186) | Std.Pred. Mod.Eq. Res. | Std.Pred. LOO Res. |
|----|------------|---------------|--------------------|---------------------|-----------|----------------|---------------------|------------------------|--------------------|
| 1  | Training   | 5.664         | 5.7385             | 0.0745              | 5.7399    | 0.0759         | 0.0182              | 0.2129                 | 0.2168             |
| 2  | Training   | 6             | 5.8829             | -0.1171             | 5.8775    | -0.1225        | 0.0443              | -0.3389                | -0.3546            |
| 3  | Training   | 6.174         | 5.8145             | -0.3595             | 5.8036    | -0.3704        | 0.0294              | -1.0326                | -1.0639            |
| 4  | Prediction | 6.31          | 5.9553             | -0.3547             | -         | -              | 0.027               | -1.0177                | -1.0177            |
| 5  | Prediction | 5.971         | 5.9475             | -0.0235             | -         | -              | 0.0264              | -0.0673                | -0.0673            |
| 6  | Training   | 6.357         | 5.8162             | -0.5408             | 5.7996    | -0.5574        | 0.0297              | -1.5537                | -1.6013            |
| 7  | Prediction | 6.495         | 5.7691             | -0.7259             | -         | -              | 0.0303              | -2.0861                | -2.0861            |
| 8  | Training   | 5.093         | 5.5462             | 0.4532              | 5.5548    | 0.4618         | 0.0186              | 1.2945                 | 1.319              |
| 9  | Training   | 5.686         | 5.6905             | 0.0045              | 5.6908    | 0.0048         | 0.0434              | 0.0132                 | 0.0138             |
| 10 | Prediction | 5.456         | 5.628              | 0.172               | -         | -              | 0.0302              | 0.4942                 | 0.4942             |
| 11 | Training   | 5.728         | 5.9309             | 0.2029              | 5.9362    | 0.2082         | 0.0254              | 0.5815                 | 0.5967             |
| 12 | Training   | 5.79          | 5.9324             | 0.1424              | 5.9361    | 0.1461         | 0.0255              | 0.4082                 | 0.4189             |
| 13 | Training   | 5.991         | 5.7995             | -0.1915             | 5.7943    | -0.1967        | 0.0268              | -0.5492                | -0.5643            |
| 14 | Prediction | 5.78          | 5.765              | -0.015              | -         | -              | 0.03                | -0.0432                | -0.0432            |
| 15 | Training   | 5.073         | 5.4257             | 0.3527              | 5.4305    | 0.3575         | 0.0133              | 1.0049                 | 1.0185             |
| 16 | Training   | 5.738         | 5.5715             | -0.1665             | 5.5679    | -0.1701        | 0.0215              | -0.4762                | -0.4866            |
| 17 | Training   | 5.879         | 5.8195             | -0.0595             | 5.818     | -0.061         | 0.0253              | -0.1705                | -0.1749            |
| 18 | Training   | 5.807         | 5.8093             | 0.0023              | 5.8093    | 0.0023         | 0.0258              | 0.0065                 | 0.0066             |
| 19 | Training   | 6.102         | 5.6871             | -0.4149             | 5.6813    | -0.4207        | 0.0138              | -1.1822                | -1.1987            |
| 20 | Prediction | 5.86          | 5.6377             | -0.2223             | -         | -              | 0.0287              | -0.6383                | -0.6383            |
| 21 | Training   | 5.115         | 5.3052             | 0.1902              | 5.3108    | 0.1958         | 0.0283              | 0.5461                 | 0.5621             |
| 22 | Training   | 4.928         | 5.3833             | 0.4553              | 5.391     | 0.463          | 0.0166              | 1.2993                 | 1.3212             |
| 23 | Training   | 5.189         | 5.3052             | 0.1162              | 5.3086    | 0.1196         | 0.0283              | 0.3337                 | 0.3434             |
| 24 | Training   | 5.471         | 5.3052             | -0.1658             | 5.3004    | -0.1706        | 0.0283              | -0.4759                | -0.4897            |
| 25 | Prediction | 5.556         | 5.3052             | -0.2508             | -         | -              | 0.0283              | -0.7199                | -0.7199            |
| 26 | Training   | 5.295         | 5.3052             | 0.0102              | 5.3055    | 0.0105         | 0.0283              | 0.0294                 | 0.0302             |
| 27 | Training   | 5.421         | 5.3052             | -0.1158             | 5.3019    | -0.1191        | 0.0283              | -0.3323                | -0.342             |
| 28 | Training   | 5.502         | 5.3052             | -0.1968             | 5.2995    | -0.2025        | 0.0283              | -0.5649                | -0.5813            |
| 29 | Training   | 5.391         | 5.3052             | -0.0858             | 5.3027    | -0.0883        | 0.0283              | -0.2462                | -0.2534            |
| 30 | Training   | 5.034         | 5.3052             | 0.2712              | 5.3131    | 0.2791         | 0.0283              | 0.7787                 | 0.8014             |
| 31 | Training   | 5.04          | 5.4304             | 0.3904              | 5.4353    | 0.3953         | 0.0124              | 1.1118                 | 1.1258             |
| 32 | Training   | 5.46          | 5.3052             | -0.1548             | 5.3007    | -0.1593        | 0.0283              | -0.4443                | -0.4572            |
| 33 | Prediction | 5.342         | 5.3052             | -0.0368             | -         | -              | 0.0283              | -0.1055                | -0.1055            |
| 34 | Prediction | 5.354         | 5.3773             | 0.0233              | -         | -              | 0.0173              | 0.0666                 | 0.0666             |
| 35 | Training   | 5.6           | 5.3052             | -0.2948             | 5.2966    | -0.3034        | 0.0283              | -0.8462                | -0.8709            |
| 36 | Training   | 4.746         | 5.3052             | 0.5592              | 5.3215    | 0.5755         | 0.0283              | 1.6055                 | 1.6523             |
| 37 | Training   | 5.481         | 5.4734             | -0.0076             | 5.4733    | -0.0077        | 0.0105              | -0.0217                | -0.0219            |
| 38 | Training   | 5.399         | 5.4736             | 0.0746              | 5.4744    | 0.0754         | 0.0105              | 0.2122                 | 0.2145             |
| 39 | Training   | 5.772         | 5.4703             | -0.3017             | 5.4671    | -0.3049        | 0.0105              | -0.8582                | -0.8674            |

|    |            |       |        |         |        |         |        |         |         |
|----|------------|-------|--------|---------|--------|---------|--------|---------|---------|
| 40 | Prediction | 5.243 | 5.3052 | 0.0622  | -      | -       | 0.0283 | 0.1787  | 0.1787  |
| 41 | Training   | 5.91  | 5.735  | -0.175  | 5.7222 | -0.1878 | 0.0678 | -0.513  | -0.5503 |
| 42 | Training   | 4.914 | 5.3052 | 0.3912  | 5.3166 | 0.4026  | 0.0283 | 1.1232  | 1.1559  |
| 43 | Training   | 5.298 | 5.3052 | 0.0072  | 5.3054 | 0.0074  | 0.0283 | 0.0208  | 0.0214  |
| 44 | Training   | 5.264 | 5.3052 | 0.0412  | 5.3064 | 0.0424  | 0.0283 | 0.1184  | 0.1218  |
| 45 | Prediction | 5.456 | 5.3052 | -0.1508 | -      | -       | 0.0283 | -0.4328 | -0.4328 |
| 46 | Training   | 5.59  | 5.3052 | -0.2848 | 5.2969 | -0.2931 | 0.0283 | -0.8175 | -0.8413 |
| 47 | Training   | 5.437 | 4.8755 | -0.5615 | 4.8527 | -0.5843 | 0.039  | -1.6209 | -1.6868 |
| 48 | Training   | 5.339 | 5.3052 | -0.0338 | 5.3043 | -0.0347 | 0.0283 | -0.0969 | -0.0997 |
| 49 | Prediction | 5.22  | 5.3052 | 0.0852  | -      | -       | 0.0283 | 0.2447  | 0.2447  |
| 50 | Prediction | 4.942 | 5.3695 | 0.4275  | -      | -       | 0.0183 | 1.221   | 1.221   |
| 51 | Training   | 4.931 | 5.2729 | 0.3419  | 5.2785 | 0.3475  | 0.0162 | 0.9754  | 0.9914  |
| 52 | Training   | 5.248 | 5.2731 | 0.0251  | 5.2745 | 0.0265  | 0.0515 | 0.073   | 0.077   |
| 53 | Training   | 4.943 | 5.1633 | 0.2203  | 5.1796 | 0.2366  | 0.069  | 0.646   | 0.6938  |
| 54 | Training   | 5.315 | 4.8064 | -0.5086 | 4.6837 | -0.6313 | 0.1944 | -1.6035 | -1.9904 |
| 55 | Training   | 4.681 | 4.743  | 0.062   | 4.7482 | 0.0672  | 0.0764 | 0.1827  | 0.1978  |
| 56 | Training   | 4.556 | 5.0685 | 0.5125  | 5.1173 | 0.5613  | 0.087  | 1.5179  | 1.6625  |
| 57 | Prediction | 4.674 | 4.5441 | -0.1299 | -      | -       | 0.0785 | -0.3831 | -0.3831 |
| 58 | Training   | 4.633 | 4.6728 | 0.0398  | 4.6761 | 0.0431  | 0.0756 | 0.1172  | 0.1268  |
| 59 | Training   | 4.361 | 4.6739 | 0.3129  | 4.6994 | 0.3384  | 0.0755 | 0.9208  | 0.996   |
| 60 | Prediction | 4.482 | 4.6509 | 0.1689  | -      | -       | 0.0753 | 0.4969  | 0.4969  |
| 61 | Training   | 4.756 | 4.7676 | 0.0116  | 4.7687 | 0.0127  | 0.0843 | 0.0343  | 0.0374  |
| 62 | Training   | 4.623 | 4.7443 | 0.1213  | 4.7544 | 0.1314  | 0.0763 | 0.3572  | 0.3868  |
| 63 | Training   | 4.814 | 4.5658 | -0.2482 | 4.5459 | -0.2681 | 0.074  | -0.73   | -0.7883 |
| 64 | Prediction | 5.163 | 4.5425 | -0.6205 | -      | -       | 0.0783 | -1.8289 | -1.8289 |
| 65 | Training   | 4.566 | 4.6731 | 0.1071  | 4.6818 | 0.1158  | 0.0755 | 0.3152  | 0.3409  |
| 66 | Training   | 4.673 | 4.6735 | 0.0005  | 4.6736 | 0.0006  | 0.0755 | 0.0015  | 0.0016  |
| 67 | Training   | 4.762 | 4.9157 | 0.1537  | 4.9292 | 0.1672  | 0.0809 | 0.4536  | 0.4935  |
| 68 | Training   | 5.223 | 4.8072 | -0.4158 | 4.7631 | -0.4599 | 0.0959 | -1.2374 | -1.3687 |
| 69 | Training   | 4.634 | 5.2994 | 0.6654  | 5.327  | 0.693   | 0.0399 | 1.9217  | 2.0015  |
| 70 | Training   | 5.143 | 5.3211 | 0.1781  | 5.3309 | 0.1879  | 0.0524 | 0.5176  | 0.5462  |
| 71 | Training   | 4.87  | 5.4192 | 0.5492  | 5.4357 | 0.5657  | 0.0292 | 1.5774  | 1.6249  |
| 72 | Training   | 6.027 | 5.5292 | -0.4978 | 5.5239 | -0.5031 | 0.0106 | -1.4162 | -1.4314 |
| 73 | Training   | 6.42  | 5.6305 | -0.7895 | 5.6156 | -0.8044 | 0.0185 | -2.2551 | -2.2976 |
| 74 | Training   | 5.91  | 5.6316 | -0.2784 | 5.6263 | -0.2837 | 0.0187 | -0.7952 | -0.8103 |
| 75 | Training   | 5.415 | 5.8386 | 0.4236  | 5.8474 | 0.4324  | 0.0203 | 1.211   | 1.2361  |
| 76 | Prediction | 5.914 | 5.8437 | -0.0703 | -      | -       | 0.0208 | -0.2011 | -0.2011 |
| 77 | Training   | 5.314 | 5.5587 | 0.2447  | 5.5616 | 0.2476  | 0.0119 | 0.6965  | 0.7049  |
| 78 | Training   | 5.754 | 6.2035 | 0.4495  | 6.2342 | 0.4802  | 0.064  | 1.3148  | 1.4047  |
| 79 | Training   | 5.793 | 5.5577 | -0.2353 | 5.5549 | -0.2381 | 0.0118 | -0.6698 | -0.6778 |
| 80 | Prediction | 4.991 | 6.0152 | 1.0242  | -      | -       | 0.0342 | 2.9492  | 2.9492  |
| 81 | Prediction | 6.26  | 5.6947 | -0.5653 | -      | -       | 0.0287 | -1.6233 | -1.6233 |
| 82 | Training   | 5.489 | 5.6629 | 0.1739  | 5.6925 | 0.2035  | 0.1454 | 0.5323  | 0.6228  |
| 83 | Training   | 5.333 | 5.6648 | 0.3318  | 5.7213 | 0.3883  | 0.1455 | 1.0157  | 1.1886  |
| 84 | Training   | 5.116 | 5.1279 | 0.0119  | 5.128  | 0.012   | 0.0123 | 0.0338  | 0.0342  |
| 85 | Training   | 5.511 | 5.6624 | 0.1514  | 5.6881 | 0.1771  | 0.1454 | 0.4633  | 0.5421  |
| 86 | Training   | 5.83  | 5.2847 | -0.5453 | 5.2766 | -0.5534 | 0.0146 | -1.5546 | -1.5777 |
| 87 | Training   | 5.499 | 5.5614 | 0.0624  | 5.5639 | 0.0649  | 0.0396 | 0.1801  | 0.1875  |
| 88 | Training   | 5.274 | 5.1289 | -0.1451 | 5.1271 | -0.1469 | 0.0122 | -0.4131 | -0.4182 |
| 89 | Training   | 5.423 | 5.1268 | -0.2962 | 5.1231 | -0.2999 | 0.0123 | -0.8434 | -0.8539 |
| 90 | Training   | 4.594 | 4.4254 | -0.1686 | 4.408  | -0.186  | 0.0938 | -0.5011 | -0.553  |

|     |            |       |        |         |        |         |        |         |         |
|-----|------------|-------|--------|---------|--------|---------|--------|---------|---------|
| 91  | Training   | 4.388 | 4.77   | 0.382   | 4.8123 | 0.4243  | 0.0998 | 1.1393  | 1.2656  |
| 92  | Training   | 5.164 | 4.8542 | -0.3098 | 4.8241 | -0.3399 | 0.0887 | -0.9183 | -1.0077 |
| 93  | Training   | 4.641 | 4.6379 | -0.0031 | 4.6376 | -0.0034 | 0.079  | -0.0092 | -0.01   |
| 94  | Training   | 4.494 | 5.1101 | 0.6161  | 5.1327 | 0.6387  | 0.0353 | 1.7752  | 1.8402  |
| 95  | Training   | 4.916 | 5.0625 | 0.1465  | 5.0645 | 0.1485  | 0.0132 | 0.4175  | 0.423   |
| 96  | Training   | 5.1   | 5.0395 | -0.0605 | 5.038  | -0.062  | 0.0236 | -0.1733 | -0.1775 |
| 97  | Training   | 5.159 | 5.0604 | -0.0986 | 5.0591 | -0.0999 | 0.0132 | -0.2808 | -0.2846 |
| 98  | Training   | 5.063 | 4.9531 | -0.1099 | 4.951  | -0.112  | 0.019  | -0.3141 | -0.3201 |
| 99  | Training   | 5.226 | 4.7768 | -0.4492 | 4.7578 | -0.4682 | 0.0405 | -1.2978 | -1.3525 |
| 100 | Prediction | 4.994 | 5.0613 | 0.0673  | -      | -       | 0.0132 | 0.1918  | 0.1918  |
| 101 | Training   | 5.139 | 4.9319 | -0.2071 | 4.9247 | -0.2143 | 0.0339 | -0.5962 | -0.6171 |
| 102 | Training   | 5.09  | 5.0613 | -0.0287 | 5.0609 | -0.0291 | 0.0132 | -0.0818 | -0.0829 |
| 103 | Training   | 5.103 | 5.0618 | -0.0412 | 5.0613 | -0.0417 | 0.0132 | -0.1173 | -0.1189 |
| 104 | Prediction | 4.883 | 4.9295 | 0.0465  | -      | -       | 0.0337 | 0.1338  | 0.1338  |
| 105 | Training   | 5.233 | 5.0615 | -0.1715 | 5.0592 | -0.1738 | 0.0132 | -0.4886 | -0.4951 |
| 106 | Prediction | 5.025 | 4.9525 | -0.0725 | -      | -       | 0.019  | -0.207  | -0.207  |
| 107 | Training   | 4.445 | 5.0646 | 0.6196  | 5.0729 | 0.6279  | 0.0132 | 1.7651  | 1.7887  |
| 108 | Training   | 4.71  | 5.0647 | 0.3547  | 5.0695 | 0.3595  | 0.0132 | 1.0106  | 1.0241  |
| 109 | Prediction | 4.546 | 4.9311 | 0.3851  | -      | -       | 0.0339 | 1.1087  | 1.1087  |
| 110 | Training   | 4.46  | 4.956  | 0.496   | 4.9656 | 0.5056  | 0.019  | 1.4172  | 1.4447  |
| 111 | Training   | 4.991 | 5.0606 | 0.0696  | 5.0615 | 0.0705  | 0.0132 | 0.1981  | 0.2008  |
| 112 | Training   | 4.722 | 4.7052 | -0.0168 | 4.7037 | -0.0183 | 0.0828 | -0.0496 | -0.0541 |
| 113 | Prediction | 4.655 | 4.9554 | 0.3004  | -      | -       | 0.019  | 0.8581  | 0.8581  |
| 114 | Training   | 5.05  | 4.9304 | -0.1196 | 4.9262 | -0.1238 | 0.0338 | -0.3444 | -0.3564 |
| 115 | Training   | 4.835 | 5.0287 | 0.1937  | 5.0331 | 0.1981  | 0.0226 | 0.5543  | 0.5672  |
| 116 | Training   | 5.105 | 5.137  | 0.032   | 5.1375 | 0.0325  | 0.0157 | 0.0914  | 0.0928  |
| 117 | Prediction | 4.872 | 5.0643 | 0.1923  | -      | -       | 0.0132 | 0.5479  | 0.5479  |
| 118 | Training   | 4.767 | 4.9562 | 0.1892  | 4.9598 | 0.1928  | 0.019  | 0.5405  | 0.5509  |
| 119 | Training   | 5.024 | 5.2091 | 0.1851  | 5.2196 | 0.1956  | 0.0537 | 0.5385  | 0.5691  |
| 120 | Training   | 4.989 | 5.0646 | 0.0756  | 5.0656 | 0.0766  | 0.0132 | 0.2152  | 0.2181  |
| 121 | Training   | 5.107 | 5.5393 | 0.4323  | 5.5441 | 0.4371  | 0.0109 | 1.2302  | 1.2438  |
| 122 | Training   | 5.306 | 5.5388 | 0.2328  | 5.5413 | 0.2353  | 0.0109 | 0.6623  | 0.6696  |
| 123 | Training   | 5.917 | 5.5385 | -0.3785 | 5.5343 | -0.3827 | 0.0109 | -1.077  | -1.0889 |
| 124 | Training   | 5.578 | 5.5389 | -0.0391 | 5.5385 | -0.0395 | 0.0109 | -0.1111 | -0.1124 |
| 125 | Training   | 5.078 | 5.5384 | 0.4604  | 5.5435 | 0.4655  | 0.0109 | 1.31    | 1.3244  |
| 126 | Training   | 5.674 | 5.6219 | -0.0521 | 5.6209 | -0.0531 | 0.0174 | -0.1488 | -0.1515 |
| 127 | Training   | 6.959 | 6.0442 | -0.9148 | 6.011  | -0.948  | 0.035  | -2.6353 | -2.731  |
| 128 | Training   | 5.979 | 5.9936 | 0.0146  | 5.9941 | 0.0151  | 0.0341 | 0.042   | 0.0435  |
| 129 | Training   | 6.357 | 5.8895 | -0.4675 | 5.878  | -0.479  | 0.0239 | -1.3392 | -1.372  |
| 130 | Training   | 6.387 | 5.8895 | -0.4975 | 5.8773 | -0.5097 | 0.0239 | -1.4251 | -1.4601 |
| 131 | Training   | 5.558 | 5.3619 | -0.1961 | 5.3596 | -0.1984 | 0.0114 | -0.5581 | -0.5646 |
| 132 | Training   | 5.793 | 5.9342 | 0.1412  | 5.9379 | 0.1449  | 0.0256 | 0.4047  | 0.4154  |
| 133 | Training   | 5.489 | 5.9352 | 0.4462  | 5.9469 | 0.4579  | 0.0256 | 1.2792  | 1.3129  |
| 134 | Training   | 5.65  | 5.9137 | 0.2637  | 5.9217 | 0.2717  | 0.0296 | 0.7575  | 0.7806  |
| 135 | Training   | 5.358 | 5.9142 | 0.5562  | 5.9312 | 0.5732  | 0.0296 | 1.598   | 1.6468  |
| 136 | Training   | 5.561 | 5.9345 | 0.3735  | 5.9443 | 0.3833  | 0.0256 | 1.0708  | 1.099   |
| 137 | Training   | 6.721 | 6.04   | -0.681  | 6.0154 | -0.7056 | 0.0349 | -1.9617 | -2.0326 |
| 138 | Training   | 6.62  | 6.3608 | -0.2592 | 6.3377 | -0.2823 | 0.0819 | -0.7655 | -0.8337 |
| 139 | Training   | 5.936 | 5.9195 | -0.0165 | 5.919  | -0.017  | 0.0305 | -0.0475 | -0.049  |
| 140 | Prediction | 5.59  | 5.9321 | 0.3421  | -      | -       | 0.0255 | 0.9808  | 0.9808  |
| 141 | Training   | 5.272 | 5.6101 | 0.3381  | 5.6157 | 0.3437  | 0.0161 | 0.9646  | 0.9804  |

|     |            |       |        |         |        |         |        |         |         |
|-----|------------|-------|--------|---------|--------|---------|--------|---------|---------|
| 142 | Training   | 6.456 | 6.0391 | -0.4169 | 6.024  | -0.432  | 0.0348 | -1.201  | -1.2443 |
| 143 | Prediction | 6.252 | 6.0402 | -0.2118 | -      | -       | 0.0349 | -0.6102 | -0.6102 |
| 144 | Training   | 6.585 | 6.0402 | -0.5448 | 6.0205 | -0.5645 | 0.0349 | -1.5695 | -1.6262 |
| 145 | Training   | 5.815 | 5.7196 | -0.0954 | 5.7181 | -0.0969 | 0.0163 | -0.2721 | -0.2766 |
| 146 | Prediction | 5.539 | 5.7181 | 0.1791  | -      | -       | 0.0162 | 0.5109  | 0.5109  |
| 147 | Training   | 5.064 | 5.7181 | 0.6541  | 5.7288 | 0.6648  | 0.0162 | 1.8661  | 1.8967  |
| 148 | Training   | 5.212 | 5.0597 | -0.1523 | 5.0577 | -0.1543 | 0.0132 | -0.4339 | -0.4397 |
| 149 | Prediction | 5.523 | 4.931  | -0.592  | -      | -       | 0.0338 | -1.7043 | -1.7043 |
| 150 | Training   | 5.319 | 5.0179 | -0.3011 | 5.003  | -0.316  | 0.0472 | -0.8729 | -0.9161 |
| 151 | Training   | 5.701 | 5.2197 | -0.4813 | 5.2067 | -0.4943 | 0.0264 | -1.3803 | -1.4178 |
| 152 | Training   | 5.243 | 5.0223 | -0.2207 | 5.015  | -0.228  | 0.0319 | -0.6348 | -0.6557 |
| 153 | Prediction | 5.544 | 5.1087 | -0.4353 | -      | -       | 0.0374 | -1.2557 | -1.2557 |
| 154 | Prediction | 7.097 | 5.9768 | -1.1202 | -      | -       | 0.0535 | -3.2585 | -3.2585 |
| 155 | Training   | 6.108 | 5.4577 | -0.6503 | 5.4505 | -0.6575 | 0.011  | -1.8503 | -1.8708 |
| 156 | Training   | 4.066 | 5.2386 | 1.1726  | 5.2568 | 1.1908  | 0.0153 | 3.3439  | 3.3958  |
| 157 | Training   | 5.229 | 5.8614 | 0.6324  | 5.8888 | 0.6598  | 0.0415 | 1.828   | 1.907   |
| 158 | Training   | 6.367 | 5.704  | -0.663  | 5.6539 | -0.7131 | 0.0704 | -1.9458 | -2.093  |
| 159 | Training   | 5.157 | 5.6955 | 0.5385  | 5.7104 | 0.5534  | 0.027  | 1.5448  | 1.5877  |
| 160 | Prediction | 4.658 | 5.6044 | 0.9464  | -      | -       | 0.0265 | 2.7144  | 2.7144  |
| 161 | Training   | 5.147 | 5.3314 | 0.1844  | 5.3396 | 0.1926  | 0.0428 | 0.5332  | 0.557   |
| 162 | Training   | 5.305 | 5.1766 | -0.1284 | 5.1735 | -0.1315 | 0.0233 | -0.3678 | -0.3765 |
| 163 | Training   | 5.092 | 5.1754 | 0.0834  | 5.1773 | 0.0853  | 0.0233 | 0.2387  | 0.2444  |
| 164 | Training   | 5.783 | 5.1783 | -0.6047 | 5.1638 | -0.6192 | 0.0234 | -1.7315 | -1.7731 |
| 165 | Prediction | 5.377 | 5.1771 | -0.1999 | -      | -       | 0.0234 | -0.5724 | -0.5724 |
| 166 | Training   | 5.09  | 5.1755 | 0.0855  | 5.1776 | 0.0876  | 0.0233 | 0.245   | 0.2508  |
| 167 | Prediction | 5.498 | 5.1761 | -0.3219 | -      | -       | 0.0233 | -0.9218 | -0.9218 |
| 168 | Training   | 5.313 | 5.1777 | -0.1353 | 5.1745 | -0.1385 | 0.0234 | -0.3873 | -0.3966 |
| 169 | Prediction | 5.035 | 5.1773 | 0.1423  | -      | -       | 0.0234 | 0.4075  | 0.4075  |
| 170 | Training   | 7.301 | 7.1776 | -0.1234 | 7.1696 | -0.1314 | 0.0611 | -0.3604 | -0.3838 |
| 171 | Training   | 7     | 7.1782 | 0.1782  | 7.1898 | 0.1898  | 0.0611 | 0.5203  | 0.5542  |
| 172 | Training   | 7.398 | 7.179  | -0.219  | 7.1648 | -0.2332 | 0.0611 | -0.6394 | -0.6811 |
| 173 | Training   | 6.921 | 7.1787 | 0.2577  | 7.1954 | 0.2744  | 0.0611 | 0.7525  | 0.8015  |
| 174 | Training   | 7.155 | 7.1777 | 0.0227  | 7.1792 | 0.0242  | 0.0611 | 0.0663  | 0.0706  |
| 175 | Prediction | 7.155 | 7.178  | 0.023   | -      | -       | 0.0611 | 0.0673  | 0.0673  |
| 176 | Training   | 7     | 7.1772 | 0.1772  | 7.1887 | 0.1887  | 0.0611 | 0.5175  | 0.5512  |
| 177 | Training   | 7.155 | 7.1779 | 0.0229  | 7.1794 | 0.0244  | 0.0611 | 0.0668  | 0.0711  |
| 178 | Training   | 7.155 | 7.1767 | 0.0217  | 7.1781 | 0.0231  | 0.0612 | 0.0634  | 0.0676  |
| 179 | Training   | 7.222 | 7.2629 | 0.0409  | 7.2656 | 0.0436  | 0.0622 | 0.1196  | 0.1275  |
| 180 | Training   | 7.301 | 7.263  | -0.038  | 7.2604 | -0.0406 | 0.0622 | -0.1111 | -0.1185 |
| 181 | Training   | 7.301 | 7.177  | -0.124  | 7.169  | -0.132  | 0.0611 | -0.3621 | -0.3857 |
| 182 | Training   | 7.222 | 7.1784 | -0.0436 | 7.1755 | -0.0465 | 0.0611 | -0.1275 | -0.1358 |
| 183 | Training   | 7.301 | 6.2533 | -1.0477 | 6.1675 | -1.1335 | 0.0758 | -3.0838 | -3.3366 |
| 184 | Training   | 7     | 7.341  | 0.341   | 7.3665 | 0.3665  | 0.0694 | 1.0004  | 1.0751  |
| 185 | Training   | 7.301 | 7.1774 | -0.1236 | 7.1694 | -0.1316 | 0.0611 | -0.3609 | -0.3844 |
| 186 | Prediction | 7.097 | 7.1787 | 0.0817  | -      | -       | 0.0611 | 0.2385  | 0.2385  |
| 187 | Prediction | 7.155 | 6.8214 | -0.3336 | -      | -       | 0.1084 | -0.9998 | -0.9998 |
| 188 | Prediction | 7.097 | 6.8204 | -0.2766 | -      | -       | 0.1084 | -0.829  | -0.829  |
| 189 | Training   | 6.959 | 6.799  | -0.16   | 6.7744 | -0.1846 | 0.1335 | -0.4863 | -0.5612 |
| 190 | Training   | 6.585 | 6.8013 | 0.2163  | 6.8346 | 0.2496  | 0.1335 | 0.6576  | 0.7589  |
| 191 | Training   | 6.638 | 6.7988 | 0.1608  | 6.8236 | 0.1856  | 0.1335 | 0.489   | 0.5643  |
| 192 | Training   | 6.886 | 6.7991 | -0.0869 | 6.7857 | -0.1003 | 0.1335 | -0.2641 | -0.3048 |

|     |            |       |        |         |        |         |        |         |         |
|-----|------------|-------|--------|---------|--------|---------|--------|---------|---------|
| 193 | Training   | 6.796 | 6.7989 | 0.0029  | 6.7993 | 0.0033  | 0.1335 | 0.0088  | 0.0102  |
| 194 | Prediction | 4.648 | 5.1699 | 0.5219  | -      | -       | 0.0183 | 1.4906  | 1.4906  |
| 195 | Training   | 4.831 | 4.991  | 0.16    | 4.9936 | 0.1626  | 0.0159 | 0.4563  | 0.4637  |
| 196 | Training   | 4.776 | 5.1697 | 0.3937  | 5.177  | 0.401   | 0.0183 | 1.1243  | 1.1453  |
| 197 | Training   | 4.429 | 4.9549 | 0.5259  | 4.9726 | 0.5436  | 0.0326 | 1.5131  | 1.5641  |
| 198 | Training   | 5.12  | 5.1685 | 0.0485  | 5.1694 | 0.0494  | 0.0184 | 0.1385  | 0.1411  |
| 199 | Training   | 5.229 | 4.9908 | -0.2382 | 4.9869 | -0.2421 | 0.0159 | -0.6796 | -0.6906 |
| 200 | Prediction | 5.026 | 5.1683 | 0.1423  | -      | -       | 0.0184 | 0.4064  | 0.4064  |
| 201 | Training   | 5.042 | 5.1705 | 0.1285  | 5.1729 | 0.1309  | 0.0182 | 0.367   | 0.3738  |
| 202 | Training   | 5.303 | 4.9915 | -0.3115 | 4.9865 | -0.3165 | 0.0159 | -0.8885 | -0.9028 |
| 203 | Training   | 4.645 | 5.1686 | 0.5236  | 5.1784 | 0.5334  | 0.0184 | 1.4955  | 1.5234  |
| 204 | Training   | 5.051 | 4.9914 | -0.0596 | 4.9904 | -0.0606 | 0.0159 | -0.1701 | -0.1728 |
| 205 | Training   | 5.554 | 5.1709 | -0.3831 | 5.1638 | -0.3902 | 0.0182 | -1.094  | -1.1143 |
| 206 | Training   | 4.957 | 4.9912 | 0.0342  | 4.9918 | 0.0348  | 0.0159 | 0.0976  | 0.0992  |
| 207 | Training   | 5.194 | 5.1696 | -0.0244 | 5.1691 | -0.0249 | 0.0183 | -0.0697 | -0.071  |
| 208 | Training   | 4.844 | 4.9903 | 0.1463  | 4.9927 | 0.1487  | 0.016  | 0.4175  | 0.4242  |
| 209 | Training   | 4.575 | 5.2532 | 0.6782  | 5.2637 | 0.6887  | 0.0152 | 1.934   | 1.9639  |
| 210 | Training   | 5.324 | 5.0753 | -0.2487 | 5.072  | -0.252  | 0.0133 | -0.7084 | -0.718  |
| 211 | Training   | 5.228 | 4.9912 | -0.2368 | 4.9873 | -0.2407 | 0.0159 | -0.6756 | -0.6865 |
| 212 | Training   | 5.301 | 5.1691 | -0.1319 | 5.1666 | -0.1344 | 0.0183 | -0.3767 | -0.3838 |
| 213 | Training   | 5.682 | 4.9912 | -0.6908 | 4.9801 | -0.7019 | 0.0159 | -1.9705 | -2.0023 |
| 214 | Training   | 5.745 | 5.1696 | -0.5754 | 5.1589 | -0.5861 | 0.0183 | -1.6433 | -1.6739 |
| 215 | Prediction | 5.412 | 5.1696 | -0.2424 | -      | -       | 0.0183 | -0.6923 | -0.6923 |
| 216 | Training   | 5.353 | 4.9918 | -0.3612 | 4.9859 | -0.3671 | 0.0159 | -1.0305 | -1.0471 |
| 217 | Training   | 5.205 | 5.2562 | 0.0512  | 5.257  | 0.052   | 0.0152 | 0.1459  | 0.1482  |
| 218 | Training   | 4.485 | 5.0748 | 0.5898  | 5.0827 | 0.5977  | 0.0133 | 1.6802  | 1.7027  |
| 219 | Training   | 5.143 | 4.6572 | -0.4858 | 4.6074 | -0.5356 | 0.093  | -1.4434 | -1.5914 |

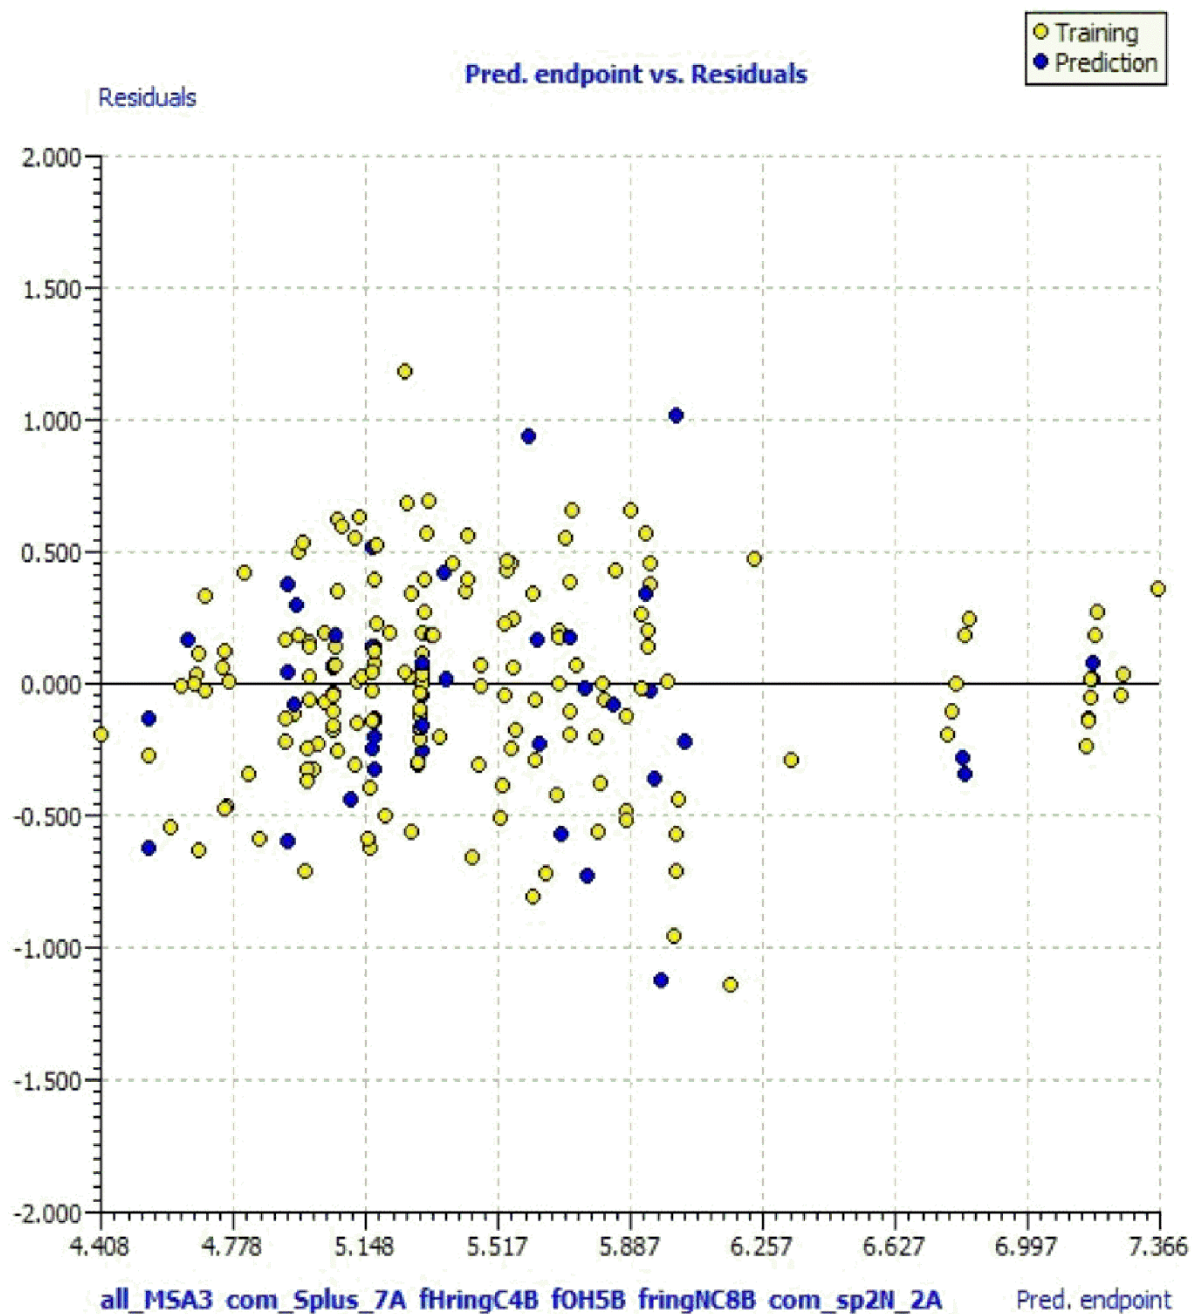

(a)

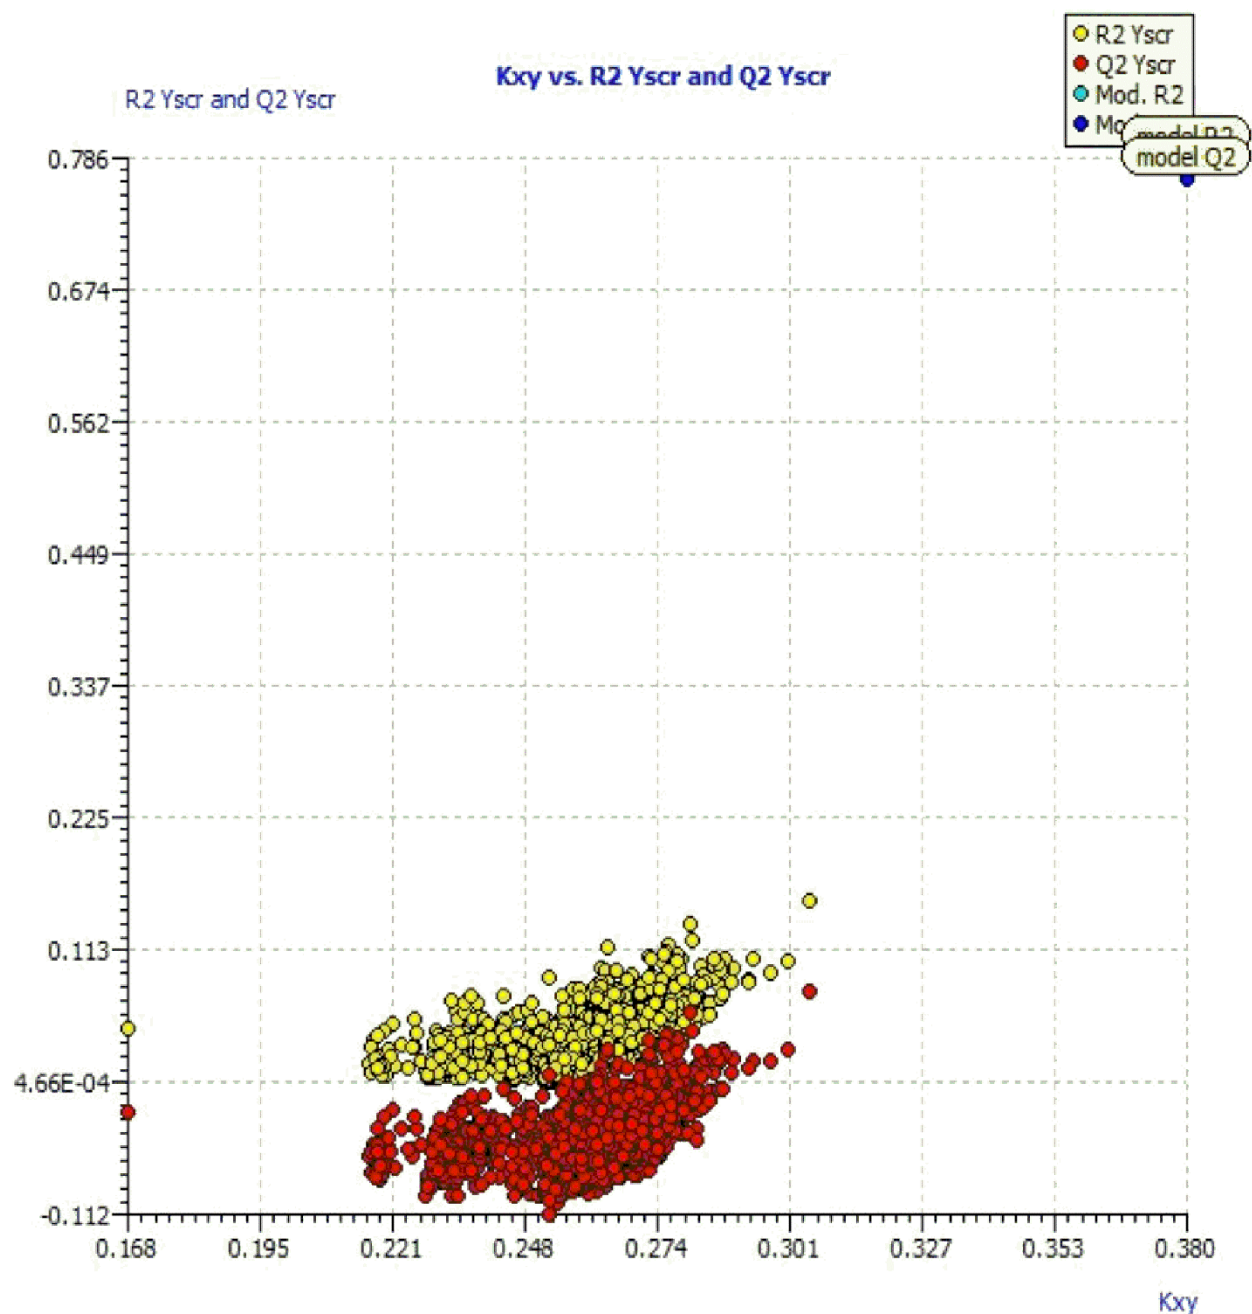

(b)

**Figure S1:** Different graphs associated with model 1.1 (a) graph of pred. endpoint vs. residual values (b) Y-scrambling plot

**Table S2:** Details regarding performance of model 1.2

| ID | Status   | Exp. endpoint | Pred. by model eq. | Pred. Mod.E q.Res. | Pred. LOO | Pred. LOO Res. | HAT i/i (h*=0.1186) | Std.Pred .Mod.Eq . Res. | Std.Pred .LOO Res. |
|----|----------|---------------|--------------------|--------------------|-----------|----------------|---------------------|-------------------------|--------------------|
| 1  | Training | 5.664         | 5.7992             | 0.1352             | 5.8021    | 0.1381         | 0.0206              | 0.3866                  | 0.3947             |
| 2  | Training | 6             | 5.9406             | -0.0594            | 5.9377    | -0.0623        | 0.0453              | -0.1721                 | -0.1803            |
| 3  | Training | 6.174         | 5.8736             | -0.3004            | 5.864     | -0.31          | 0.0311              | -0.8634                 | -0.8911            |

|    |            |       |        |         |        |         |        |         |         |
|----|------------|-------|--------|---------|--------|---------|--------|---------|---------|
| 4  | Prediction | 6.31  | 6.0029 | -0.3071 | -      | -       | 0.0287 | -0.8816 | -0.8816 |
| 5  | Prediction | 5.971 | 5.9953 | 0.0243  | -      | -       | 0.0282 | 0.0697  | 0.0697  |
| 6  | Training   | 6.357 | 5.8752 | -0.4818 | 5.8596 | -0.4974 | 0.0314 | -1.3849 | -1.4297 |
| 7  | Prediction | 6.495 | 5.932  | -0.563  | -      | -       | 0.0535 | -1.6373 | -1.6373 |
| 8  | Training   | 5.093 | 5.626  | 0.533   | 5.6383 | 0.5453  | 0.0225 | 1.5253  | 1.5603  |
| 9  | Training   | 5.686 | 5.7673 | 0.0813  | 5.7712 | 0.0852  | 0.0455 | 0.2355  | 0.2468  |
| 10 | Prediction | 5.456 | 5.7061 | 0.2501  | -      | -       | 0.033  | 0.7195  | 0.7195  |
| 11 | Training   | 5.728 | 5.979  | 0.251   | 5.986  | 0.258   | 0.0273 | 0.72    | 0.7402  |
| 12 | Training   | 5.79  | 5.9805 | 0.1905  | 5.9858 | 0.1958  | 0.0274 | 0.5464  | 0.5618  |
| 13 | Training   | 5.991 | 5.8589 | -0.1321 | 5.8551 | -0.1359 | 0.0286 | -0.3791 | -0.3902 |
| 14 | Prediction | 5.78  | 5.8317 | 0.0517  | -      | -       | 0.033  | 0.1487  | 0.1487  |
| 15 | Training   | 5.073 | 5.5082 | 0.4352  | 5.5165 | 0.4435  | 0.0188 | 1.2429  | 1.2666  |
| 16 | Training   | 5.738 | 5.6509 | -0.0871 | 5.6486 | -0.0894 | 0.0251 | -0.2497 | -0.2561 |
| 17 | Training   | 5.879 | 5.87   | -0.009  | 5.8698 | -0.0092 | 0.0281 | -0.0258 | -0.0265 |
| 18 | Training   | 5.807 | 5.86   | 0.053   | 5.8615 | 0.0545  | 0.0288 | 0.152   | 0.1565  |
| 19 | Training   | 6.102 | 5.7489 | -0.3531 | 5.7429 | -0.3591 | 0.0167 | -1.0073 | -1.0244 |
| 20 | Prediction | 5.86  | 5.7071 | -0.1529 | -      | -       | 0.0331 | -0.4399 | -0.4399 |
| 21 | Training   | 5.115 | 5.2831 | 0.1681  | 5.2881 | 0.1731  | 0.0285 | 0.4826  | 0.4968  |
| 22 | Training   | 4.928 | 5.3595 | 0.4315  | 5.3671 | 0.4391  | 0.0171 | 1.2315  | 1.2529  |
| 23 | Training   | 5.189 | 5.2831 | 0.0941  | 5.2859 | 0.0969  | 0.0285 | 0.2702  | 0.2781  |
| 24 | Training   | 5.471 | 5.2831 | -0.1879 | 5.2776 | -0.1934 | 0.0285 | -0.5392 | -0.5551 |
| 25 | Prediction | 5.556 | 5.2831 | -0.2729 | -      | -       | 0.0285 | -0.7832 | -0.7832 |
| 26 | Training   | 5.295 | 5.2831 | -0.0119 | 5.2828 | -0.0122 | 0.0285 | -0.0341 | -0.0351 |
| 27 | Training   | 5.421 | 5.2831 | -0.1379 | 5.2791 | -0.1419 | 0.0285 | -0.3957 | -0.4073 |
| 28 | Training   | 5.502 | 5.2831 | -0.2189 | 5.2767 | -0.2253 | 0.0285 | -0.6282 | -0.6467 |
| 29 | Training   | 5.391 | 5.2831 | -0.1079 | 5.28   | -0.111  | 0.0285 | -0.3096 | -0.3187 |
| 30 | Training   | 5.034 | 5.2831 | 0.2491  | 5.2905 | 0.2565  | 0.0285 | 0.7151  | 0.7361  |
| 31 | Training   | 5.04  | 5.4057 | 0.3657  | 5.4105 | 0.3705  | 0.0131 | 1.0414  | 1.0552  |
| 32 | Training   | 5.46  | 5.2831 | -0.1769 | 5.2779 | -0.1821 | 0.0285 | -0.5077 | -0.5226 |
| 33 | Prediction | 5.342 | 5.2831 | -0.0589 | -      | -       | 0.0285 | -0.169  | -0.169  |
| 34 | Prediction | 5.354 | 5.3537 | -0.0003 | -      | -       | 0.0178 | -0.0009 | -0.0009 |
| 35 | Training   | 5.6   | 5.2831 | -0.3169 | 5.2738 | -0.3262 | 0.0285 | -0.9095 | -0.9362 |
| 36 | Training   | 4.746 | 5.2831 | 0.5371  | 5.2989 | 0.5529  | 0.0285 | 1.5418  | 1.5871  |
| 37 | Training   | 5.481 | 5.4477 | -0.0333 | 5.4473 | -0.0337 | 0.0113 | -0.0947 | -0.0958 |
| 38 | Training   | 5.399 | 5.4479 | 0.0489  | 5.4485 | 0.0495  | 0.0113 | 0.1392  | 0.1408  |
| 39 | Training   | 5.772 | 5.4447 | -0.3273 | 5.4409 | -0.3311 | 0.0114 | -0.9313 | -0.942  |
| 40 | Prediction | 5.243 | 5.2831 | 0.0401  | -      | -       | 0.0285 | 0.1152  | 0.1152  |
| 41 | Training   | 5.91  | 5.6868 | -0.2232 | 5.6703 | -0.2397 | 0.0685 | -0.6544 | -0.7025 |
| 42 | Training   | 4.914 | 5.2831 | 0.3691  | 5.294  | 0.38    | 0.0285 | 1.0596  | 1.0907  |
| 43 | Training   | 5.298 | 5.2831 | -0.0149 | 5.2827 | -0.0153 | 0.0285 | -0.0427 | -0.0439 |
| 44 | Training   | 5.264 | 5.2831 | 0.0191  | 5.2837 | 0.0197  | 0.0285 | 0.0549  | 0.0565  |
| 45 | Prediction | 5.456 | 5.2831 | -0.1729 | -      | -       | 0.0285 | -0.4962 | -0.4962 |
| 46 | Training   | 5.59  | 5.2831 | -0.3069 | 5.2741 | -0.3159 | 0.0285 | -0.8808 | -0.9067 |
| 47 | Training   | 5.437 | 4.8795 | -0.5575 | 4.8569 | -0.5801 | 0.039  | -1.6089 | -1.6743 |
| 48 | Training   | 5.339 | 5.3794 | 0.0404  | 5.3808 | 0.0418  | 0.0349 | 0.1163  | 0.1205  |
| 49 | Prediction | 5.22  | 5.3794 | 0.1594  | -      | -       | 0.0349 | 0.459   | 0.459   |



|    |            |       |        |         |        |         |        |         |         |
|----|------------|-------|--------|---------|--------|---------|--------|---------|---------|
| 50 | Prediction | 4.942 | 5.4423 | 0.5003  | -      | -       | 0.024  | 1.4327  | 1.4327  |
| 51 | Training   | 4.931 | 5.3519 | 0.4209  | 5.3616 | 0.4306  | 0.0225 | 1.2045  | 1.2322  |
| 52 | Training   | 5.248 | 5.3696 | 0.1216  | 5.3773 | 0.1293  | 0.0597 | 0.3548  | 0.3773  |
| 53 | Training   | 4.943 | 5.2621 | 0.3191  | 5.2894 | 0.3464  | 0.0789 | 0.9406  | 1.0212  |
| 54 | Training   | 5.315 | 4.9429 | -0.3721 | 4.8439 | -0.4711 | 0.2102 | -1.1845 | -1.4998 |
| 55 | Training   | 4.681 | 4.7835 | 0.1025  | 4.7922 | 0.1112  | 0.0784 | 0.3021  | 0.3278  |
| 56 | Training   | 4.556 | 5.0893 | 0.5333  | 5.1407 | 0.5847  | 0.0879 | 1.5799  | 1.7322  |
| 57 | Prediction | 4.674 | 4.5118 | -0.1622 | -      | -       | 0.0801 | -0.4784 | -0.4784 |
| 58 | Training   | 4.633 | 4.6293 | -0.0037 | 4.629  | -0.004  | 0.0774 | -0.0108 | -0.0117 |
| 59 | Training   | 4.361 | 4.6304 | 0.2694  | 4.6529 | 0.2919  | 0.0773 | 0.7934  | 0.8598  |
| 60 | Prediction | 4.482 | 4.7083 | 0.2263  | -      | -       | 0.0779 | 0.6669  | 0.6669  |
| 61 | Training   | 4.756 | 4.8033 | 0.0473  | 4.8077 | 0.0517  | 0.0864 | 0.1399  | 0.1532  |
| 62 | Training   | 4.623 | 4.7848 | 0.1618  | 4.7985 | 0.1755  | 0.0784 | 0.4767  | 0.5172  |
| 63 | Training   | 4.814 | 4.6251 | -0.1889 | 4.6092 | -0.2048 | 0.0775 | -0.5565 | -0.6032 |
| 64 | Prediction | 5.163 | 4.6066 | -0.5564 | -      | -       | 0.0814 | -1.6424 | -1.6424 |
| 65 | Training   | 4.566 | 4.7259 | 0.1599  | 4.7395 | 0.1735  | 0.0785 | 0.4711  | 0.5113  |
| 66 | Training   | 4.673 | 4.63   | -0.043  | 4.6264 | -0.0466 | 0.0773 | -0.1266 | -0.1372 |
| 67 | Training   | 4.762 | 4.8628 | 0.1008  | 4.8721 | 0.1101  | 0.0842 | 0.298   | 0.3254  |
| 68 | Training   | 5.223 | 4.7651 | -0.4579 | 4.7148 | -0.5082 | 0.0991 | -1.3647 | -1.5148 |
| 69 | Training   | 4.634 | 5.2071 | 0.5731  | 5.2384 | 0.6044  | 0.0518 | 1.665   | 1.756   |
| 70 | Training   | 5.143 | 5.3288 | 0.1858  | 5.339  | 0.196   | 0.052  | 0.5398  | 0.5694  |
| 71 | Training   | 4.87  | 5.3069 | 0.4369  | 5.3282 | 0.4582  | 0.0463 | 1.2658  | 1.3273  |
| 72 | Training   | 6.027 | 5.5023 | -0.5247 | 5.4961 | -0.5309 | 0.0117 | -1.4931 | -1.5108 |
| 73 | Training   | 6.42  | 5.6015 | -0.8185 | 5.5847 | -0.8353 | 0.0202 | -2.3394 | -2.3875 |
| 74 | Training   | 5.91  | 5.6026 | -0.3074 | 5.5962 | -0.3138 | 0.0203 | -0.8787 | -0.8969 |
| 75 | Training   | 5.415 | 5.7967 | 0.3817  | 5.8056 | 0.3906  | 0.0228 | 1.0923  | 1.1178  |
| 76 | Prediction | 5.914 | 5.8979 | -0.0161 | -      | -       | 0.0228 | -0.0461 | -0.0461 |
| 77 | Training   | 5.314 | 5.5312 | 0.2172  | 5.5341 | 0.2201  | 0.0132 | 0.6185  | 0.6268  |
| 78 | Training   | 5.754 | 6.1368 | 0.3828  | 6.1647 | 0.4107  | 0.0677 | 1.1218  | 1.2033  |
| 79 | Training   | 5.793 | 5.5302 | -0.2628 | 5.5268 | -0.2662 | 0.0131 | -0.7483 | -0.7582 |
| 80 | Prediction | 4.991 | 5.961  | 0.97    | -      | -       | 0.0373 | 2.797   | 2.797   |
| 81 | Prediction | 6.26  | 5.7605 | -0.4995 | -      | -       | 0.0307 | -1.4353 | -1.4353 |
| 82 | Training   | 5.489 | 5.3777 | -0.1113 | 5.3754 | -0.1136 | 0.0201 | -0.3182 | -0.3247 |
| 83 | Training   | 5.333 | 5.2833 | -0.0497 | 5.2825 | -0.0505 | 0.0148 | -0.1417 | -0.1439 |
| 84 | Training   | 5.116 | 5.2251 | 0.1091  | 5.2273 | 0.1113  | 0.0202 | 0.3118  | 0.3183  |
| 85 | Training   | 5.511 | 5.3772 | -0.1338 | 5.3744 | -0.1366 | 0.02   | -0.3825 | -0.3903 |
| 86 | Training   | 5.83  | 5.2823 | -0.5477 | 5.2742 | -0.5558 | 0.0147 | -1.5609 | -1.5843 |
| 87 | Training   | 5.499 | 5.5489 | 0.0499  | 5.551  | 0.052   | 0.0404 | 0.1441  | 0.1502  |
| 88 | Training   | 5.274 | 5.1299 | -0.1441 | 5.1281 | -0.1459 | 0.0122 | -0.4103 | -0.4153 |
| 89 | Training   | 5.423 | 5.1278 | -0.2952 | 5.1241 | -0.2989 | 0.0123 | -0.8403 | -0.8508 |
| 90 | Training   | 4.594 | 4.1966 | -0.3974 | 4.1273 | -0.4667 | 0.1486 | -1.2184 | -1.431  |
| 91 | Training   | 4.388 | 4.9007 | 0.5127  | 4.9669 | 0.5789  | 0.1144 | 1.5413  | 1.7404  |
| 92 | Training   | 5.164 | 4.9832 | -0.1808 | 4.9627 | -0.2013 | 0.1015 | -0.5398 | -0.6007 |
| 93 | Training   | 4.641 | 4.6848 | 0.0438  | 4.6887 | 0.0477  | 0.0814 | 0.1294  | 0.1408  |
| 94 | Training   | 4.494 | 5.0261 | 0.5321  | 5.0512 | 0.5572  | 0.0451 | 1.5404  | 1.6131  |
| 95 | Training   | 4.916 | 4.9729 | 0.0569  | 4.9743 | 0.0583  | 0.0239 | 0.1629  | 0.1669  |

|     |            |       |        |         |        |         |        |         |         |
|-----|------------|-------|--------|---------|--------|---------|--------|---------|---------|
| 96  | Training   | 5.1   | 4.9546 | -0.1454 | 4.9494 | -0.1506 | 0.0346 | -0.4187 | -0.4337 |
| 97  | Training   | 5.159 | 4.9708 | -0.1882 | 4.9662 | -0.1928 | 0.0238 | -0.5388 | -0.552  |
| 98  | Training   | 5.063 | 4.9663 | -0.0967 | 4.9644 | -0.0986 | 0.0187 | -0.2763 | -0.2816 |
| 99  | Training   | 5.226 | 4.7125 | -0.5135 | 4.6869 | -0.5391 | 0.0476 | -1.4885 | -1.5628 |
| 100 | Prediction | 4.994 | 4.9717 | -0.0223 | -      | -       | 0.0238 | -0.0638 | -0.0638 |
| 101 | Training   | 5.139 | 4.8536 | -0.2854 | 4.8404 | -0.2986 | 0.044  | -0.8259 | -0.864  |
| 102 | Training   | 5.09  | 4.9717 | -0.1183 | 4.9688 | -0.1212 | 0.0238 | -0.3388 | -0.3471 |
| 103 | Training   | 5.103 | 4.9722 | -0.1308 | 4.969  | -0.134  | 0.0239 | -0.3746 | -0.3837 |
| 104 | Prediction | 4.883 | 4.8512 | -0.0318 | -      | -       | 0.0437 | -0.0921 | -0.0921 |
| 105 | Training   | 5.233 | 4.9719 | -0.2611 | 4.9655 | -0.2675 | 0.0238 | -0.7477 | -0.766  |
| 106 | Prediction | 5.025 | 4.9657 | -0.0593 | -      | -       | 0.0187 | -0.1693 | -0.1693 |
| 107 | Training   | 4.445 | 4.8787 | 0.4337  | 4.9032 | 0.4582  | 0.0535 | 1.2612  | 1.3325  |
| 108 | Training   | 4.71  | 4.9751 | 0.2651  | 4.9815 | 0.2715  | 0.0239 | 0.759   | 0.7776  |
| 109 | Prediction | 4.546 | 4.8527 | 0.3067  | -      | -       | 0.0439 | 0.8875  | 0.8875  |
| 110 | Training   | 4.46  | 4.9691 | 0.5091  | 4.9789 | 0.5189  | 0.0188 | 1.4541  | 1.4819  |
| 111 | Training   | 4.991 | 4.971  | -0.02   | 4.9705 | -0.0205 | 0.0238 | -0.0574 | -0.0588 |
| 112 | Training   | 4.722 | 4.6533 | -0.0687 | 4.6466 | -0.0754 | 0.0882 | -0.2036 | -0.2233 |
| 113 | Prediction | 4.655 | 4.8722 | 0.2172  | -      | -       | 0.0287 | 0.6236  | 0.6236  |
| 114 | Training   | 5.05  | 4.852  | -0.198  | 4.843  | -0.207  | 0.0438 | -0.5727 | -0.599  |
| 115 | Training   | 4.835 | 4.944  | 0.109   | 4.9478 | 0.1128  | 0.0335 | 0.3136  | 0.3245  |
| 116 | Training   | 5.105 | 5.0458 | -0.0592 | 5.0441 | -0.0609 | 0.0275 | -0.1698 | -0.1746 |
| 117 | Prediction | 4.872 | 4.8784 | 0.0064  | -      | -       | 0.0535 | 0.0187  | 0.0187  |
| 118 | Training   | 4.767 | 4.873  | 0.106   | 4.8762 | 0.1092  | 0.0288 | 0.3044  | 0.3134  |
| 119 | Training   | 5.024 | 5.1206 | 0.0966  | 5.1276 | 0.1036  | 0.0674 | 0.283   | 0.3034  |
| 120 | Training   | 4.989 | 4.8786 | -0.1104 | 4.8724 | -0.1166 | 0.0535 | -0.321  | -0.3391 |
| 121 | Training   | 5.107 | 5.6085 | 0.5015  | 5.616  | 0.509   | 0.0147 | 1.4294  | 1.4507  |
| 122 | Training   | 5.306 | 5.6079 | 0.3019  | 5.6124 | 0.3064  | 0.0147 | 0.8606  | 0.8734  |
| 123 | Training   | 5.917 | 5.6077 | -0.3093 | 5.6031 | -0.3139 | 0.0147 | -0.8816 | -0.8947 |
| 124 | Training   | 5.578 | 5.5119 | -0.0661 | 5.5111 | -0.0669 | 0.0121 | -0.1882 | -0.1905 |
| 125 | Training   | 5.078 | 5.5113 | 0.4333  | 5.5166 | 0.4386  | 0.0121 | 1.2334  | 1.2485  |
| 126 | Training   | 5.674 | 5.6893 | 0.0153  | 5.6896 | 0.0156  | 0.0203 | 0.0437  | 0.0446  |
| 127 | Training   | 6.959 | 6.0857 | -0.8733 | 6.0525 | -0.9065 | 0.0366 | -2.5172 | -2.6127 |
| 128 | Training   | 5.979 | 5.9399 | -0.0391 | 5.9384 | -0.0406 | 0.0369 | -0.1127 | -0.117  |
| 129 | Training   | 6.357 | 5.8422 | -0.5148 | 5.8282 | -0.5288 | 0.0264 | -1.476  | -1.5161 |
| 130 | Training   | 6.387 | 5.8422 | -0.5448 | 5.8274 | -0.5596 | 0.0264 | -1.562  | -1.6044 |
| 131 | Training   | 5.558 | 5.4499 | -0.1081 | 5.4481 | -0.1099 | 0.0168 | -0.3084 | -0.3137 |
| 132 | Training   | 5.793 | 5.886  | 0.093   | 5.8887 | 0.0957  | 0.0284 | 0.2669  | 0.2747  |
| 133 | Training   | 5.489 | 5.887  | 0.398   | 5.8987 | 0.4097  | 0.0285 | 1.1424  | 1.1759  |
| 134 | Training   | 5.65  | 5.8702 | 0.2202  | 5.8776 | 0.2276  | 0.0326 | 0.6333  | 0.6547  |
| 135 | Training   | 5.358 | 5.8707 | 0.5127  | 5.8881 | 0.5301  | 0.0327 | 1.4749  | 1.5248  |
| 136 | Training   | 5.561 | 5.8863 | 0.3253  | 5.8959 | 0.3349  | 0.0284 | 0.9338  | 0.9611  |
| 137 | Training   | 6.721 | 5.9853 | -0.7357 | 5.9561 | -0.7649 | 0.0382 | -2.1223 | -2.2065 |
| 138 | Training   | 6.62  | 6.2866 | -0.3334 | 6.2549 | -0.3651 | 0.0867 | -0.9871 | -1.0807 |
| 139 | Training   | 5.936 | 5.8758 | -0.0602 | 5.8737 | -0.0623 | 0.0336 | -0.1731 | -0.1792 |
| 140 | Prediction | 5.59  | 5.884  | 0.294   | -      | -       | 0.0283 | 0.8438  | 0.8438  |
| 141 | Training   | 5.272 | 5.5815 | 0.3095  | 5.5871 | 0.3151  | 0.0177 | 0.8836  | 0.8995  |

|     |            |       |        |         |        |         |        |         |         |
|-----|------------|-------|--------|---------|--------|---------|--------|---------|---------|
| 142 | Training   | 6.456 | 5.9844 | -0.4716 | 5.9657 | -0.4903 | 0.0381 | -1.3604 | -1.4143 |
| 143 | Prediction | 6.252 | 6.0817 | -0.1703 | -      | -       | 0.0364 | -0.4908 | -0.4908 |
| 144 | Training   | 6.585 | 6.0817 | -0.5033 | 6.0627 | -0.5223 | 0.0364 | -1.4506 | -1.5054 |
| 145 | Training   | 5.815 | 5.6845 | -0.1305 | 5.6821 | -0.1329 | 0.0183 | -0.3726 | -0.3796 |
| 146 | Prediction | 5.539 | 5.683  | 0.144   | -      | -       | 0.0181 | 0.411   | 0.411   |
| 147 | Training   | 5.064 | 5.683  | 0.619   | 5.6944 | 0.6304  | 0.0181 | 1.7672  | 1.7998  |
| 148 | Training   | 5.212 | 5.2589 | 0.0469  | 5.2612 | 0.0492  | 0.0482 | 0.1359  | 0.1428  |
| 149 | Prediction | 5.523 | 5.1414 | -0.3816 | -      | -       | 0.0687 | -1.1187 | -1.1187 |
| 150 | Training   | 5.319 | 5.2265 | -0.0925 | 5.2185 | -0.1005 | 0.0791 | -0.2728 | -0.2963 |
| 151 | Training   | 5.701 | 5.4047 | -0.2963 | 5.3873 | -0.3137 | 0.0553 | -0.8626 | -0.9131 |
| 152 | Training   | 5.243 | 5.2157 | -0.0273 | 5.2138 | -0.0292 | 0.0649 | -0.08   | -0.0856 |
| 153 | Prediction | 5.544 | 5.3002 | -0.2438 | -      | -       | 0.0677 | -0.7143 | -0.7143 |
| 154 | Prediction | 7.097 | 6.0305 | -1.0665 | -      | -       | 0.0558 | -3.1052 | -3.1052 |
| 155 | Training   | 6.108 | 5.6249 | -0.4831 | 5.6056 | -0.5024 | 0.0384 | -1.3938 | -1.4494 |
| 156 | Training   | 4.066 | 5.2264 | 1.1604  | 5.2448 | 1.1788  | 0.0156 | 3.3089  | 3.3614  |
| 157 | Training   | 5.229 | 5.9261 | 0.6971  | 5.9578 | 0.7288  | 0.0435 | 2.0165  | 2.1081  |
| 158 | Training   | 6.367 | 5.7829 | -0.5841 | 5.736  | -0.631  | 0.0743 | -1.7176 | -1.8554 |
| 159 | Training   | 5.157 | 5.8642 | 0.7072  | 5.9017 | 0.7447  | 0.0504 | 2.0531  | 2.1622  |
| 160 | Prediction | 4.658 | 5.6637 | 1.0057  | -      | -       | 0.0309 | 2.8902  | 2.8902  |
| 161 | Training   | 5.147 | 5.5139 | 0.3669  | 5.5408 | 0.3938  | 0.0683 | 1.0754  | 1.1543  |
| 162 | Training   | 5.305 | 5.3624 | 0.0574  | 5.3657 | 0.0607  | 0.0535 | 0.167   | 0.1765  |
| 163 | Training   | 5.092 | 5.3612 | 0.2692  | 5.3765 | 0.2845  | 0.0535 | 0.783   | 0.8272  |
| 164 | Training   | 5.783 | 5.3642 | -0.4188 | 5.3404 | -0.4426 | 0.0536 | -1.218  | -1.287  |
| 165 | Prediction | 5.377 | 5.3629 | -0.0141 | -      | -       | 0.0535 | -0.0409 | -0.0409 |
| 166 | Training   | 5.09  | 5.3614 | 0.2714  | 5.3768 | 0.2868  | 0.0535 | 0.7893  | 0.8339  |
| 167 | Prediction | 5.498 | 5.3619 | -0.1361 | -      | -       | 0.0535 | -0.3957 | -0.3957 |
| 168 | Training   | 5.313 | 5.3636 | 0.0506  | 5.3664 | 0.0534  | 0.0536 | 0.1471  | 0.1554  |
| 169 | Prediction | 5.035 | 5.3631 | 0.3281  | -      | -       | 0.0536 | 0.9542  | 0.9542  |
| 170 | Training   | 7.301 | 7.0819 | -0.2191 | 7.0699 | -0.2311 | 0.0521 | -0.6367 | -0.6717 |
| 171 | Training   | 7     | 7.0824 | 0.0824  | 7.087  | 0.087   | 0.0521 | 0.2396  | 0.2527  |
| 172 | Training   | 7.398 | 7.0833 | -0.3147 | 7.066  | -0.332  | 0.0521 | -0.9144 | -0.9647 |
| 173 | Training   | 6.921 | 7.0829 | 0.1619  | 7.0918 | 0.1708  | 0.0521 | 0.4705  | 0.4964  |
| 174 | Training   | 7.155 | 7.082  | -0.073  | 7.078  | -0.077  | 0.0521 | -0.2122 | -0.2238 |
| 175 | Prediction | 7.155 | 7.0823 | -0.0727 | -      | -       | 0.0521 | -0.2112 | -0.2112 |
| 176 | Training   | 7     | 7.0815 | 0.0815  | 7.086  | 0.086   | 0.0521 | 0.2368  | 0.2498  |
| 177 | Training   | 7.155 | 7.0822 | -0.0728 | 7.0781 | -0.0769 | 0.0521 | -0.2117 | -0.2233 |
| 178 | Training   | 7.155 | 7.081  | -0.074  | 7.077  | -0.078  | 0.0521 | -0.2149 | -0.2268 |
| 179 | Training   | 7.222 | 7.1654 | -0.0566 | 7.1622 | -0.0598 | 0.0543 | -0.1646 | -0.1741 |
| 180 | Training   | 7.301 | 7.1654 | -0.1356 | 7.1577 | -0.1433 | 0.0543 | -0.3943 | -0.417  |
| 181 | Training   | 7.301 | 7.0813 | -0.2197 | 7.0693 | -0.2317 | 0.0521 | -0.6383 | -0.6734 |
| 182 | Training   | 7.222 | 7.0826 | -0.1394 | 7.075  | -0.147  | 0.0521 | -0.405  | -0.4272 |
| 183 | Training   | 7.301 | 6.1134 | -1.1876 | 6.0767 | -1.2243 | 0.03   | -3.4115 | -3.5169 |
| 184 | Training   | 7     | 7.2418 | 0.2418  | 7.2579 | 0.2579  | 0.0624 | 0.7066  | 0.7537  |
| 185 | Training   | 7.301 | 7.0817 | -0.2193 | 7.0697 | -0.2313 | 0.0521 | -0.6372 | -0.6722 |
| 186 | Prediction | 7.097 | 7.0829 | -0.0141 | -      | -       | 0.0521 | -0.0408 | -0.0408 |
| 187 | Prediction | 7.155 | 6.7634 | -0.3916 | -      | -       | 0.102  | -1.1692 | -1.1692 |

|     |            |       |        |         |        |         |        |         |         |
|-----|------------|-------|--------|---------|--------|---------|--------|---------|---------|
| 188 | Prediction | 7.097 | 6.7624 | -0.3346 | -      | -       | 0.102  | -0.999  | -0.999  |
| 189 | Training   | 6.959 | 7.0824 | 0.1234  | 7.0892 | 0.1302  | 0.0521 | 0.3587  | 0.3784  |
| 190 | Training   | 6.585 | 7.0847 | 0.4997  | 7.1121 | 0.5271  | 0.0521 | 1.4519  | 1.5316  |
| 191 | Training   | 6.638 | 7.0823 | 0.4443  | 7.1067 | 0.4687  | 0.0521 | 1.2909  | 1.3619  |
| 192 | Training   | 6.886 | 7.0825 | 0.1965  | 7.0933 | 0.2073  | 0.0521 | 0.5711  | 0.6024  |
| 193 | Training   | 6.796 | 7.0823 | 0.2863  | 7.098  | 0.302   | 0.0521 | 0.832   | 0.8777  |
| 194 | Prediction | 4.648 | 5.1592 | 0.5112  | -      | -       | 0.0184 | 1.4597  | 1.4597  |
| 195 | Training   | 4.831 | 4.9991 | 0.1681  | 5.0018 | 0.1708  | 0.0158 | 0.4794  | 0.4871  |
| 196 | Training   | 4.776 | 5.1589 | 0.3829  | 5.1661 | 0.3901  | 0.0185 | 1.0935  | 1.1141  |
| 197 | Training   | 4.429 | 4.9572 | 0.5282  | 4.975  | 0.546   | 0.0326 | 1.5194  | 1.5705  |
| 198 | Training   | 5.12  | 5.1578 | 0.0378  | 5.1585 | 0.0385  | 0.0186 | 0.1079  | 0.11    |
| 199 | Training   | 5.229 | 4.9989 | -0.2301 | 4.9952 | -0.2338 | 0.0158 | -0.6562 | -0.6668 |
| 200 | Prediction | 5.026 | 5.1576 | 0.1316  | -      | -       | 0.0186 | 0.3758  | 0.3758  |
| 201 | Training   | 5.042 | 5.1598 | 0.1178  | 5.162  | 0.12    | 0.0184 | 0.3363  | 0.3426  |
| 202 | Training   | 5.303 | 4.9997 | -0.3033 | 4.9948 | -0.3082 | 0.0158 | -0.865  | -0.8789 |
| 203 | Training   | 4.645 | 5.1579 | 0.5129  | 5.1676 | 0.5226  | 0.0185 | 1.4647  | 1.4923  |
| 204 | Training   | 5.051 | 4.9995 | -0.0515 | 4.9987 | -0.0523 | 0.0158 | -0.1469 | -0.1492 |
| 205 | Training   | 5.554 | 5.1602 | -0.3938 | 5.1528 | -0.4012 | 0.0184 | -1.1246 | -1.1456 |
| 206 | Training   | 4.957 | 4.9993 | 0.0423  | 5      | 0.043   | 0.0158 | 0.1207  | 0.1227  |
| 207 | Training   | 5.194 | 5.1589 | -0.0351 | 5.1582 | -0.0358 | 0.0185 | -0.1003 | -0.1022 |
| 208 | Training   | 4.844 | 4.9985 | 0.1545  | 5.001  | 0.157   | 0.0159 | 0.4406  | 0.4477  |
| 209 | Training   | 4.575 | 5.2407 | 0.6657  | 5.2512 | 0.6762  | 0.0156 | 1.8982  | 1.9283  |
| 210 | Training   | 5.324 | 5.0817 | -0.2423 | 5.0784 | -0.2456 | 0.0131 | -0.6902 | -0.6993 |
| 211 | Training   | 5.228 | 4.9993 | -0.2287 | 4.9956 | -0.2324 | 0.0158 | -0.6523 | -0.6627 |
| 212 | Training   | 5.301 | 5.1584 | -0.1426 | 5.1557 | -0.1453 | 0.0185 | -0.4073 | -0.415  |
| 213 | Training   | 5.682 | 4.9994 | -0.6826 | 4.9884 | -0.6936 | 0.0158 | -1.9467 | -1.978  |
| 214 | Training   | 5.745 | 5.1589 | -0.5861 | 5.1479 | -0.5971 | 0.0185 | -1.6738 | -1.7053 |
| 215 | Prediction | 5.412 | 5.1589 | -0.2531 | -      | -       | 0.0185 | -0.7229 | -0.7229 |
| 216 | Training   | 5.353 | 4.9999 | -0.3531 | 4.9942 | -0.3588 | 0.0158 | -1.007  | -1.0232 |
| 217 | Training   | 5.205 | 5.2436 | 0.0386  | 5.2442 | 0.0392  | 0.0156 | 0.1101  | 0.1118  |
| 218 | Training   | 4.485 | 5.0811 | 0.5961  | 5.089  | 0.604   | 0.0131 | 1.6977  | 1.7203  |
| 219 | Training   | 5.143 | 4.8151 | -0.3279 | 4.7732 | -0.3698 | 0.1132 | -0.9852 | -1.111  |

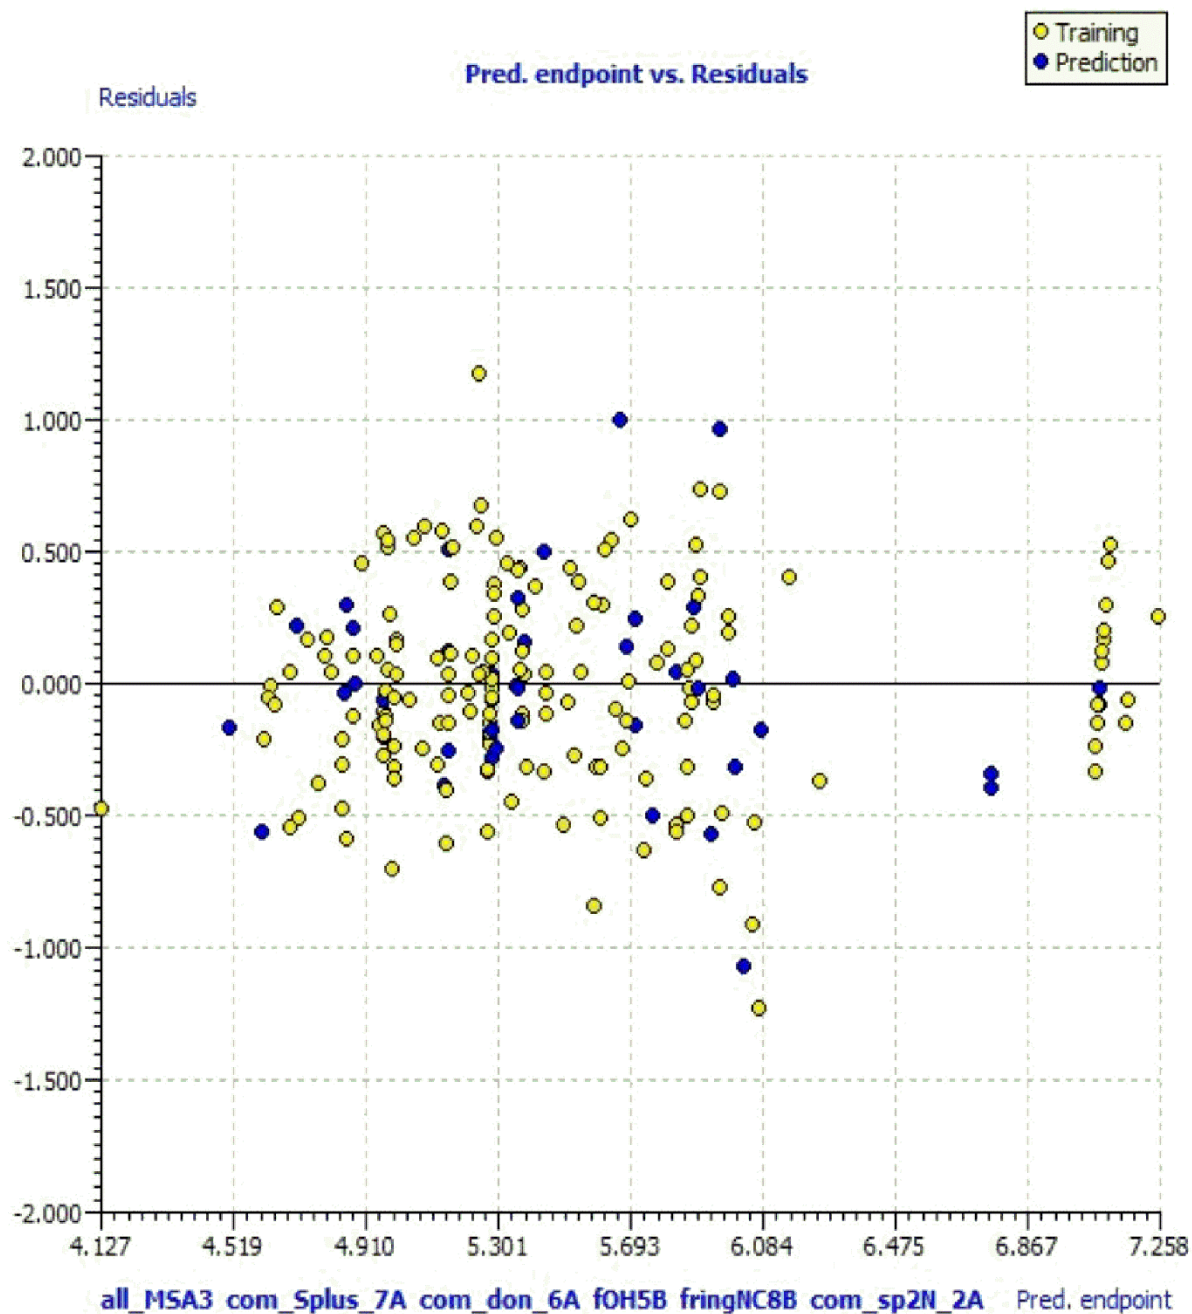

(a)

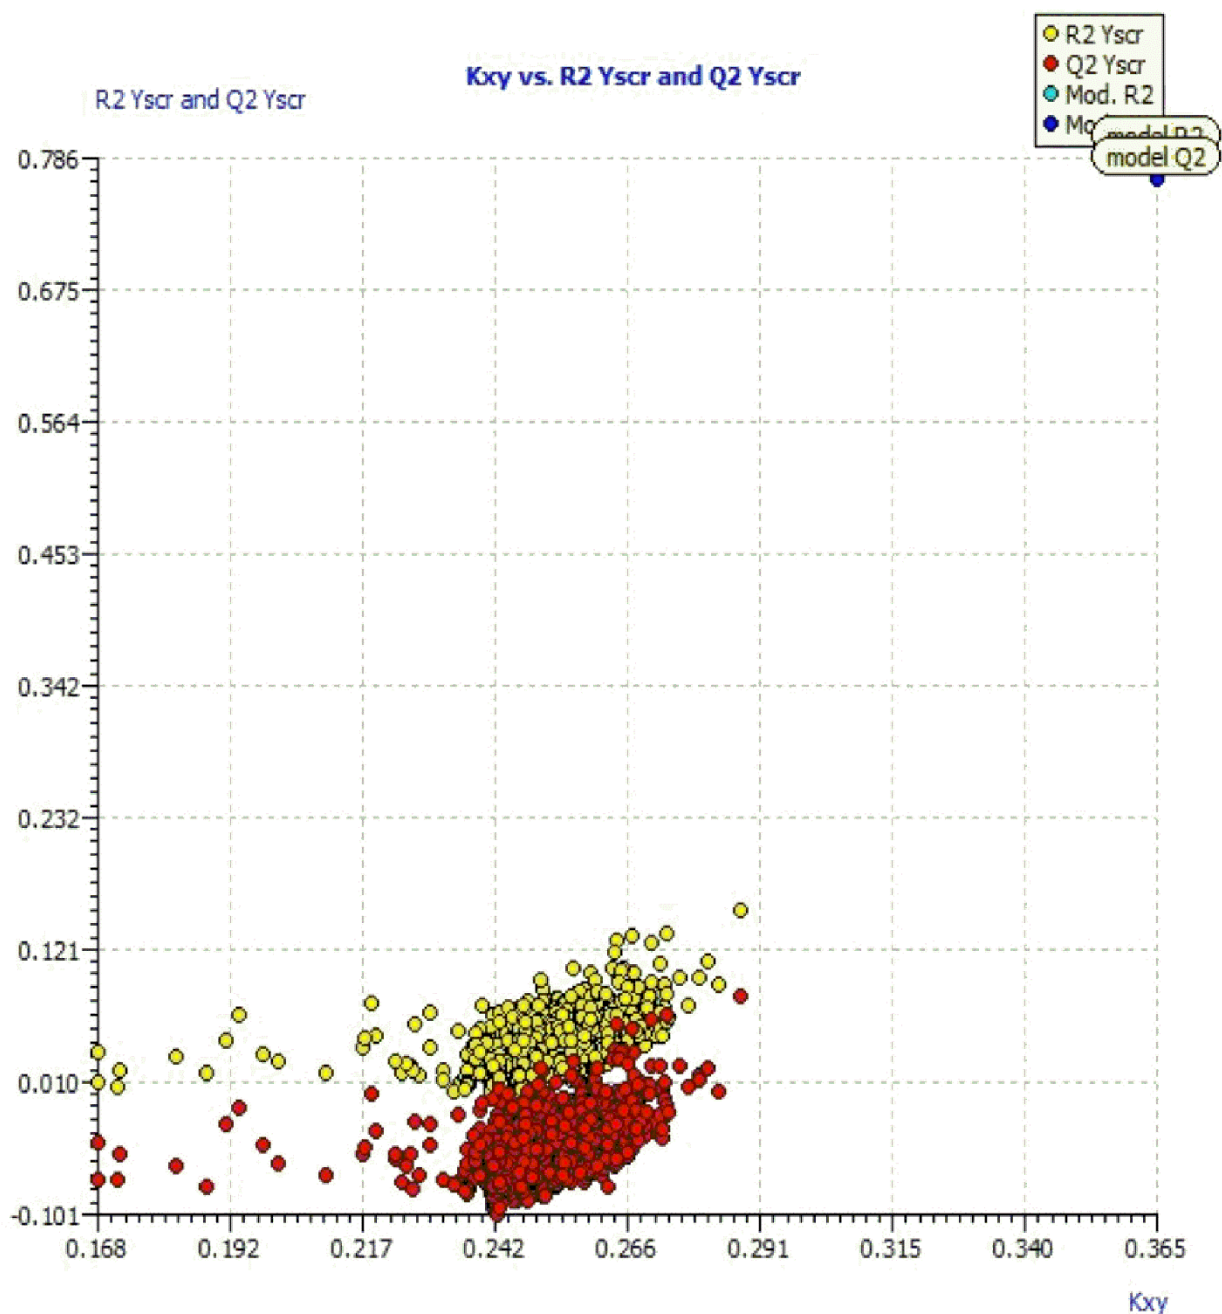

(b)

**Figure S2:** Different graphs associated with model 1.2 (a) graph of pred. endpoint vs. residual values (b) Y-scrambling plot:

**Table S3:** The values for selected molecular descriptors present in QSAR models.

| No. | pIC <sub>50</sub> | all_MSA3 | com_Splus_7A | fHringC4B | fOH5B | fringNC8B | com_sp2N_2A | com_don_6A |
|-----|-------------------|----------|--------------|-----------|-------|-----------|-------------|------------|
| 1   | 5.664             | 25.731   | 0            | 0         | 5     | 0         | 0           | 1          |
| 2   | 6                 | 37.134   | 0            | 0         | 5     | 0         | 0           | 1          |
| 3   | 6.174             | 31.731   | 0            | 0         | 5     | 0         | 0           | 1          |
| 4   | 6.31              | 25.880   | 0            | 0         | 7     | 0         | 0           | 1          |
| 5   | 5.971             | 25.268   | 0            | 0         | 7     | 0         | 0           | 1          |
| 6   | 6.357             | 31.863   | 0            | 0         | 5     | 0         | 0           | 1          |

|    |       |        |   |   |   |   |   |   |
|----|-------|--------|---|---|---|---|---|---|
| 7  | 6.495 | 25.267 | 0 | 0 | 7 | 1 | 0 | 0 |
| 8  | 5.093 | 24.631 | 0 | 0 | 5 | 1 | 0 | 1 |
| 9  | 5.686 | 36.031 | 0 | 0 | 5 | 1 | 0 | 1 |
| 10 | 5.456 | 31.090 | 0 | 0 | 5 | 1 | 0 | 1 |
| 11 | 5.728 | 23.952 | 0 | 0 | 7 | 0 | 0 | 1 |
| 12 | 5.79  | 24.073 | 0 | 0 | 7 | 0 | 0 | 1 |
| 13 | 5.991 | 30.548 | 0 | 0 | 5 | 0 | 0 | 1 |
| 14 | 5.78  | 24.940 | 0 | 0 | 7 | 1 | 0 | 1 |
| 15 | 5.073 | 15.122 | 0 | 0 | 5 | 1 | 0 | 1 |
| 16 | 5.738 | 26.634 | 0 | 0 | 5 | 1 | 0 | 1 |
| 17 | 5.879 | 15.160 | 0 | 0 | 7 | 0 | 0 | 1 |
| 18 | 5.807 | 14.349 | 0 | 0 | 7 | 0 | 0 | 1 |
| 19 | 6.102 | 21.673 | 0 | 0 | 5 | 0 | 0 | 1 |
| 20 | 5.86  | 14.891 | 0 | 0 | 7 | 1 | 0 | 1 |
| 21 | 5.115 | 0.000  | 0 | 0 | 4 | 0 | 0 | 2 |
| 22 | 4.928 | 6.163  | 0 | 0 | 4 | 0 | 0 | 2 |
| 23 | 5.189 | 0.000  | 0 | 0 | 4 | 0 | 0 | 2 |
| 24 | 5.471 | 0.000  | 0 | 0 | 4 | 0 | 0 | 2 |
| 25 | 5.556 | 0.000  | 0 | 0 | 4 | 0 | 0 | 2 |
| 26 | 5.295 | 0.000  | 0 | 0 | 4 | 0 | 0 | 2 |
| 27 | 5.421 | 0.000  | 0 | 0 | 4 | 0 | 0 | 2 |
| 28 | 5.502 | 0.000  | 0 | 0 | 4 | 0 | 0 | 2 |
| 29 | 5.391 | 0.000  | 0 | 0 | 4 | 0 | 0 | 2 |
| 30 | 5.034 | 0.000  | 0 | 0 | 4 | 0 | 0 | 2 |
| 31 | 5.04  | 9.885  | 0 | 0 | 4 | 0 | 0 | 2 |
| 32 | 5.46  | 0.000  | 0 | 0 | 4 | 0 | 0 | 2 |
| 33 | 5.342 | 0.000  | 0 | 0 | 4 | 0 | 0 | 2 |
| 34 | 5.354 | 5.693  | 0 | 0 | 4 | 0 | 0 | 2 |
| 35 | 5.6   | 0.000  | 0 | 0 | 4 | 0 | 0 | 2 |
| 36 | 4.746 | 0.000  | 0 | 0 | 4 | 0 | 0 | 2 |
| 37 | 5.481 | 13.277 | 0 | 0 | 4 | 0 | 0 | 2 |
| 38 | 5.399 | 13.294 | 0 | 0 | 4 | 0 | 0 | 2 |
| 39 | 5.772 | 13.036 | 0 | 0 | 4 | 0 | 0 | 2 |
| 40 | 5.243 | 0.000  | 0 | 0 | 4 | 0 | 0 | 2 |
| 41 | 5.91  | 0.000  | 0 | 0 | 8 | 0 | 0 | 2 |
| 42 | 4.914 | 0.000  | 0 | 0 | 4 | 0 | 0 | 2 |
| 43 | 5.298 | 0.000  | 0 | 0 | 4 | 0 | 0 | 2 |
| 44 | 5.264 | 0.000  | 0 | 0 | 4 | 0 | 0 | 2 |
| 45 | 5.456 | 0.000  | 0 | 0 | 4 | 0 | 0 | 2 |
| 46 | 5.59  | 0.000  | 0 | 0 | 4 | 0 | 0 | 2 |
| 47 | 5.437 | 0.000  | 0 | 0 | 0 | 0 | 0 | 2 |
| 48 | 5.339 | 0.000  | 0 | 0 | 4 | 0 | 0 | 1 |
| 49 | 5.22  | 0.000  | 0 | 0 | 4 | 0 | 0 | 1 |
| 50 | 4.942 | 5.074  | 0 | 0 | 4 | 0 | 0 | 1 |
| 51 | 4.931 | 5.927  | 0 | 0 | 3 | 0 | 0 | 1 |
| 52 | 5.248 | 8.676  | 0 | 0 | 6 | 2 | 0 | 1 |
| 53 | 4.943 | 0.000  | 0 | 0 | 6 | 2 | 0 | 1 |
| 54 | 5.315 | 0.000  | 0 | 0 | 6 | 4 | 0 | 1 |
| 55 | 4.681 | 6.545  | 1 | 0 | 3 | 0 | 0 | 2 |
| 56 | 4.556 | 6.796  | 1 | 0 | 6 | 0 | 0 | 2 |
| 57 | 4.674 | 13.405 | 1 | 0 | 2 | 1 | 0 | 3 |

|     |       |        |   |   |    |   |   |   |
|-----|-------|--------|---|---|----|---|---|---|
| 58  | 4.633 | 6.606  | 1 | 0 | 4  | 1 | 0 | 3 |
| 59  | 4.361 | 6.688  | 1 | 0 | 4  | 1 | 0 | 3 |
| 60  | 4.482 | 13.355 | 1 | 0 | 3  | 1 | 0 | 2 |
| 61  | 4.756 | 0.000  | 1 | 0 | 4  | 0 | 0 | 2 |
| 62  | 4.623 | 6.647  | 1 | 0 | 3  | 0 | 0 | 2 |
| 63  | 4.814 | 6.638  | 1 | 0 | 3  | 1 | 0 | 2 |
| 64  | 5.163 | 13.286 | 1 | 0 | 2  | 1 | 0 | 2 |
| 65  | 4.566 | 6.627  | 1 | 0 | 4  | 1 | 0 | 2 |
| 66  | 4.673 | 6.661  | 1 | 0 | 4  | 1 | 0 | 3 |
| 67  | 4.762 | 17.301 | 1 | 0 | 5  | 1 | 0 | 3 |
| 68  | 5.223 | 25.703 | 1 | 0 | 3  | 1 | 0 | 3 |
| 69  | 4.634 | 19.233 | 0 | 0 | 5  | 2 | 0 | 3 |
| 70  | 5.143 | 29.428 | 0 | 0 | 4  | 2 | 0 | 2 |
| 71  | 4.87  | 25.966 | 0 | 0 | 2  | 0 | 0 | 3 |
| 72  | 6.027 | 17.685 | 0 | 0 | 4  | 0 | 0 | 2 |
| 73  | 6.42  | 25.685 | 0 | 0 | 4  | 0 | 0 | 2 |
| 74  | 5.91  | 25.772 | 0 | 0 | 4  | 0 | 0 | 2 |
| 75  | 5.415 | 25.147 | 0 | 0 | 6  | 0 | 0 | 2 |
| 76  | 5.914 | 25.551 | 0 | 0 | 6  | 0 | 0 | 1 |
| 77  | 5.314 | 20.012 | 0 | 0 | 4  | 0 | 0 | 2 |
| 78  | 5.754 | 20.029 | 0 | 0 | 10 | 0 | 0 | 2 |
| 79  | 5.793 | 19.936 | 0 | 0 | 4  | 0 | 0 | 2 |
| 80  | 4.991 | 22.128 | 0 | 0 | 8  | 0 | 0 | 2 |
| 81  | 6.26  | 30.750 | 0 | 0 | 4  | 0 | 0 | 1 |
| 82  | 5.489 | 20.876 | 0 | 1 | 3  | 1 | 0 | 1 |
| 83  | 5.333 | 21.026 | 0 | 1 | 3  | 1 | 0 | 2 |
| 84  | 5.116 | 8.567  | 0 | 0 | 3  | 1 | 0 | 1 |
| 85  | 5.511 | 20.835 | 0 | 1 | 3  | 1 | 0 | 1 |
| 86  | 5.83  | 20.950 | 0 | 0 | 3  | 1 | 0 | 2 |
| 87  | 5.499 | 34.315 | 0 | 0 | 4  | 1 | 0 | 2 |
| 88  | 5.274 | 8.649  | 0 | 0 | 3  | 1 | 0 | 2 |
| 89  | 5.423 | 8.484  | 0 | 0 | 3  | 1 | 0 | 2 |
| 90  | 4.594 | 6.916  | 1 | 0 | 0  | 0 | 0 | 5 |
| 91  | 4.388 | 0.000  | 0 | 0 | 4  | 3 | 0 | 1 |
| 92  | 5.164 | 6.653  | 0 | 0 | 4  | 3 | 0 | 1 |
| 93  | 4.641 | 6.726  | 1 | 0 | 2  | 0 | 0 | 2 |
| 94  | 4.494 | 12.772 | 0 | 0 | 4  | 2 | 0 | 3 |
| 95  | 4.916 | 11.891 | 0 | 0 | 2  | 1 | 0 | 3 |
| 96  | 5.1   | 18.555 | 0 | 0 | 1  | 1 | 0 | 3 |
| 97  | 5.159 | 11.725 | 0 | 0 | 2  | 1 | 0 | 3 |
| 98  | 5.063 | 11.731 | 0 | 0 | 1  | 1 | 0 | 2 |
| 99  | 5.226 | 11.900 | 0 | 0 | 1  | 2 | 0 | 3 |
| 100 | 4.994 | 11.796 | 0 | 0 | 2  | 1 | 0 | 3 |
| 101 | 5.139 | 18.544 | 0 | 0 | 0  | 1 | 0 | 3 |
| 102 | 5.09  | 11.793 | 0 | 0 | 2  | 1 | 0 | 3 |
| 103 | 5.103 | 11.834 | 0 | 0 | 2  | 1 | 0 | 3 |
| 104 | 4.883 | 18.352 | 0 | 0 | 0  | 1 | 0 | 3 |
| 105 | 5.233 | 11.809 | 0 | 0 | 2  | 1 | 0 | 3 |
| 106 | 5.025 | 11.689 | 0 | 0 | 1  | 1 | 0 | 2 |
| 107 | 4.445 | 12.055 | 0 | 0 | 2  | 1 | 0 | 4 |
| 108 | 4.71  | 12.065 | 0 | 0 | 2  | 1 | 0 | 3 |



|     |       |        |   |   |    |   |   |   |
|-----|-------|--------|---|---|----|---|---|---|
| 109 | 4.546 | 18.480 | 0 | 0 | 0  | 1 | 0 | 3 |
| 110 | 4.46  | 11.963 | 0 | 0 | 1  | 1 | 0 | 2 |
| 111 | 4.991 | 11.734 | 0 | 0 | 2  | 1 | 0 | 3 |
| 112 | 4.722 | 11.853 | 0 | 0 | 2  | 3 | 0 | 3 |
| 113 | 4.655 | 11.911 | 0 | 0 | 1  | 1 | 0 | 3 |
| 114 | 5.05  | 18.423 | 0 | 0 | 0  | 1 | 0 | 3 |
| 115 | 4.835 | 17.700 | 0 | 0 | 1  | 1 | 0 | 3 |
| 116 | 5.105 | 17.773 | 0 | 0 | 2  | 1 | 0 | 3 |
| 117 | 4.872 | 12.034 | 0 | 0 | 2  | 1 | 0 | 4 |
| 118 | 4.767 | 11.975 | 0 | 0 | 1  | 1 | 0 | 3 |
| 119 | 5.024 | 31.948 | 0 | 0 | 1  | 1 | 0 | 3 |
| 120 | 4.989 | 12.051 | 0 | 0 | 2  | 1 | 0 | 4 |
| 121 | 5.107 | 18.485 | 0 | 0 | 4  | 0 | 0 | 1 |
| 122 | 5.306 | 18.440 | 0 | 0 | 4  | 0 | 0 | 1 |
| 123 | 5.917 | 18.418 | 0 | 0 | 4  | 0 | 0 | 1 |
| 124 | 5.578 | 18.454 | 0 | 0 | 4  | 0 | 0 | 2 |
| 125 | 5.078 | 18.410 | 0 | 0 | 4  | 0 | 0 | 2 |
| 126 | 5.674 | 25.003 | 0 | 0 | 4  | 0 | 0 | 1 |
| 127 | 6.959 | 24.420 | 0 | 0 | 8  | 0 | 0 | 1 |
| 128 | 5.979 | 20.423 | 0 | 0 | 8  | 0 | 0 | 2 |
| 129 | 6.357 | 20.683 | 0 | 0 | 7  | 0 | 0 | 2 |
| 130 | 6.387 | 20.683 | 0 | 0 | 7  | 0 | 0 | 2 |
| 131 | 5.558 | 18.563 | 0 | 0 | 4  | 1 | 0 | 1 |
| 132 | 5.793 | 24.213 | 0 | 0 | 7  | 0 | 0 | 2 |
| 133 | 5.489 | 24.294 | 0 | 0 | 7  | 0 | 0 | 2 |
| 134 | 5.65  | 31.079 | 0 | 0 | 6  | 0 | 0 | 2 |
| 135 | 5.358 | 31.123 | 0 | 0 | 6  | 0 | 0 | 2 |
| 136 | 5.561 | 24.241 | 0 | 0 | 7  | 0 | 0 | 2 |
| 137 | 6.721 | 24.085 | 0 | 0 | 8  | 0 | 0 | 2 |
| 138 | 6.62  | 23.968 | 0 | 0 | 11 | 0 | 0 | 2 |
| 139 | 5.936 | 31.536 | 0 | 0 | 6  | 0 | 0 | 2 |
| 140 | 5.59  | 24.052 | 0 | 0 | 7  | 0 | 0 | 2 |
| 141 | 5.272 | 24.074 | 0 | 0 | 4  | 0 | 0 | 2 |
| 142 | 6.456 | 24.012 | 0 | 0 | 8  | 0 | 0 | 2 |
| 143 | 6.252 | 24.098 | 0 | 0 | 8  | 0 | 0 | 1 |
| 144 | 6.585 | 24.098 | 0 | 0 | 8  | 0 | 0 | 1 |
| 145 | 5.815 | 24.240 | 0 | 0 | 5  | 0 | 0 | 2 |
| 146 | 5.539 | 24.116 | 0 | 0 | 5  | 0 | 0 | 2 |
| 147 | 5.064 | 24.116 | 0 | 0 | 5  | 0 | 0 | 2 |
| 148 | 5.212 | 11.668 | 0 | 0 | 2  | 1 | 0 | 0 |
| 149 | 5.523 | 18.474 | 0 | 0 | 0  | 1 | 0 | 0 |
| 150 | 5.319 | 25.334 | 0 | 0 | 0  | 1 | 0 | 0 |
| 151 | 5.701 | 18.697 | 0 | 0 | 1  | 0 | 0 | 0 |
| 152 | 5.243 | 11.589 | 0 | 0 | 0  | 0 | 0 | 0 |
| 153 | 5.544 | 18.411 | 0 | 0 | 0  | 0 | 0 | 0 |
| 154 | 7.097 | 24.698 | 0 | 0 | 9  | 1 | 0 | 1 |
| 155 | 6.108 | 12.043 | 0 | 0 | 4  | 0 | 0 | 0 |
| 156 | 4.066 | 11.705 | 0 | 0 | 2  | 0 | 0 | 2 |
| 157 | 5.229 | 32.557 | 0 | 0 | 7  | 1 | 0 | 1 |
| 158 | 6.367 | 25.736 | 0 | 0 | 8  | 2 | 0 | 1 |
| 159 | 5.157 | 27.937 | 0 | 0 | 6  | 1 | 0 | 0 |

|     |       |        |   |   |   |   |   |   |
|-----|-------|--------|---|---|---|---|---|---|
| 160 | 4.658 | 6.655  | 0 | 0 | 6 | 0 | 0 | 1 |
| 161 | 5.147 | 27.512 | 0 | 0 | 1 | 0 | 0 | 0 |
| 162 | 5.305 | 15.290 | 0 | 0 | 1 | 0 | 0 | 0 |
| 163 | 5.092 | 15.194 | 0 | 0 | 1 | 0 | 0 | 0 |
| 164 | 5.783 | 15.429 | 0 | 0 | 1 | 0 | 0 | 0 |
| 165 | 5.377 | 15.332 | 0 | 0 | 1 | 0 | 0 | 0 |
| 166 | 5.09  | 15.209 | 0 | 0 | 1 | 0 | 0 | 0 |
| 167 | 5.498 | 15.250 | 0 | 0 | 1 | 0 | 0 | 0 |
| 168 | 5.313 | 15.382 | 0 | 0 | 1 | 0 | 0 | 0 |
| 169 | 5.035 | 15.347 | 0 | 0 | 1 | 0 | 0 | 0 |
| 170 | 7.301 | 5.869  | 0 | 1 | 0 | 0 | 2 | 0 |
| 171 | 7     | 5.913  | 0 | 1 | 0 | 0 | 2 | 0 |
| 172 | 7.398 | 5.983  | 0 | 1 | 0 | 0 | 2 | 0 |
| 173 | 6.921 | 5.953  | 0 | 1 | 0 | 0 | 2 | 0 |
| 174 | 7.155 | 5.877  | 0 | 1 | 0 | 0 | 2 | 0 |
| 175 | 7.155 | 5.903  | 0 | 1 | 0 | 0 | 2 | 0 |
| 176 | 7     | 5.837  | 0 | 1 | 0 | 0 | 2 | 0 |
| 177 | 7.155 | 5.890  | 0 | 1 | 0 | 0 | 2 | 0 |
| 178 | 7.155 | 5.799  | 0 | 1 | 0 | 0 | 2 | 0 |
| 179 | 7.222 | 12.607 | 0 | 1 | 0 | 0 | 2 | 0 |
| 180 | 7.301 | 12.610 | 0 | 1 | 0 | 0 | 2 | 0 |
| 181 | 7.301 | 5.824  | 0 | 1 | 0 | 0 | 2 | 0 |
| 182 | 7.222 | 5.928  | 0 | 1 | 0 | 0 | 2 | 0 |
| 183 | 7.301 | 5.874  | 0 | 1 | 0 | 0 | 1 | 0 |
| 184 | 7     | 18.773 | 0 | 1 | 0 | 0 | 2 | 0 |
| 185 | 7.301 | 5.855  | 0 | 1 | 0 | 0 | 2 | 0 |
| 186 | 7.097 | 5.954  | 0 | 1 | 0 | 0 | 2 | 0 |
| 187 | 7.155 | 5.919  | 0 | 1 | 0 | 2 | 2 | 0 |
| 188 | 7.097 | 5.839  | 0 | 1 | 0 | 2 | 2 | 0 |
| 189 | 6.959 | 5.912  | 0 | 0 | 0 | 0 | 2 | 0 |
| 190 | 6.585 | 6.092  | 0 | 0 | 0 | 0 | 2 | 0 |
| 191 | 6.638 | 5.898  | 0 | 0 | 0 | 0 | 2 | 0 |
| 192 | 6.886 | 5.920  | 0 | 0 | 0 | 0 | 2 | 0 |
| 193 | 6.796 | 5.903  | 0 | 0 | 0 | 0 | 2 | 0 |
| 194 | 4.648 | 6.280  | 0 | 0 | 2 | 0 | 0 | 2 |
| 195 | 4.831 | 6.240  | 0 | 0 | 2 | 1 | 0 | 2 |
| 196 | 4.776 | 6.261  | 0 | 0 | 2 | 0 | 0 | 2 |
| 197 | 4.429 | 6.271  | 0 | 0 | 0 | 0 | 0 | 2 |
| 198 | 5.12  | 6.169  | 0 | 0 | 2 | 0 | 0 | 2 |
| 199 | 5.229 | 6.223  | 0 | 0 | 2 | 1 | 0 | 2 |
| 200 | 5.026 | 6.152  | 0 | 0 | 2 | 0 | 0 | 2 |
| 201 | 5.042 | 6.328  | 0 | 0 | 2 | 0 | 0 | 2 |
| 202 | 5.303 | 6.285  | 0 | 0 | 2 | 1 | 0 | 2 |
| 203 | 4.645 | 6.176  | 0 | 0 | 2 | 0 | 0 | 2 |
| 204 | 5.051 | 6.272  | 0 | 0 | 2 | 1 | 0 | 2 |
| 205 | 5.554 | 6.361  | 0 | 0 | 2 | 0 | 0 | 2 |
| 206 | 4.957 | 6.259  | 0 | 0 | 2 | 1 | 0 | 2 |
| 207 | 5.194 | 6.256  | 0 | 0 | 2 | 0 | 0 | 2 |
| 208 | 4.844 | 6.190  | 0 | 0 | 2 | 1 | 0 | 2 |
| 209 | 4.575 | 12.857 | 0 | 0 | 2 | 0 | 0 | 2 |
| 210 | 5.324 | 12.900 | 0 | 0 | 2 | 1 | 0 | 2 |

|     |       |        |   |   |   |   |   |   |
|-----|-------|--------|---|---|---|---|---|---|
| 211 | 5.228 | 6.255  | 0 | 0 | 2 | 1 | 0 | 2 |
| 212 | 5.301 | 6.216  | 0 | 0 | 2 | 0 | 0 | 2 |
| 213 | 5.682 | 6.262  | 0 | 0 | 2 | 1 | 0 | 2 |
| 214 | 5.745 | 6.257  | 0 | 0 | 2 | 0 | 0 | 2 |
| 215 | 5.412 | 6.255  | 0 | 0 | 2 | 0 | 0 | 2 |
| 216 | 5.353 | 6.302  | 0 | 0 | 2 | 1 | 0 | 2 |
| 217 | 5.205 | 13.092 | 0 | 0 | 2 | 0 | 0 | 2 |
| 218 | 4.485 | 12.858 | 0 | 0 | 2 | 1 | 0 | 2 |
| 219 | 5.143 | 22.342 | 1 | 0 | 2 | 1 | 0 | 1 |

**Table S4:** The SMILES notation for all two hundred and nineteen MDA-MB-231 cell anti-proliferative leads along with their reported IC<sub>50</sub> and pIC<sub>50</sub> values.

| No | SMILES                                                                                                                                                                          | IC <sub>50</sub><br>(μM) | pIC <sub>50</sub> |
|----|---------------------------------------------------------------------------------------------------------------------------------------------------------------------------------|--------------------------|-------------------|
| 1  | <chem>C1=C[C@@H]([C@]23[C@](C1=O)([C@@H]1[C@@H](C[C@H]2O3)[C@@]2([C@](CC1)(C=C[C@@H]2OC(=O)C)[C@@H]([C@@H]1OC(=O)C(=C(C1)C)C)C)O)C)OC(=O)CCCC(=O)Nc1scnn1</chem>                | 2.17                     | 5.664             |
| 2  | <chem>C1=C[C@@H]([C@]23[C@](C1=O)([C@@H]1[C@@H](C[C@H]2O3)[C@@]2([C@](CC1)(C=C[C@@H]2OC(=O)C)[C@@H]([C@@H]1OC(=O)C(=C(C1)C)C)C)O)C)OC(=O)CCCC(=O)Nc1scnn1</chem>                | 1.00                     | 6.000             |
| 3  | <chem>C1=C[C@@H]([C@]23[C@](C1=O)([C@@H]1[C@@H](C[C@H]2O3)[C@@]2([C@](CC1)(C=C[C@@H]2OC(=O)C)[C@@H]([C@@H]1OC(=O)C(=C(C1)C)C)C)O)C)OC(=O)CCCC(=O)Nc1sc2c(n1)cccc2</chem>        | 0.67                     | 6.174             |
| 4  | <chem>C1=C[C@@H]([C@]23[C@](C1=O)([C@@H]1[C@@H](C[C@H]2O3)[C@@]2([C@](CC1)(C=C[C@@H]2OC(=O)C)[C@@H]([C@@H]1OC(=O)C(=C(C1)C)C)C)O)C)OC(=O)CCCC(=O)Nc1ccc(cc1)F</chem>            | 0.49                     | 6.31              |
| 5  | <chem>C1=C[C@@H]([C@]23[C@](C1=O)([C@@H]1[C@@H](C[C@H]2O3)[C@@]2([C@](CC1)(C=C[C@@H]2OC(=O)C)[C@@H]([C@@H]1OC(=O)C(=C(C1)C)C)C)O)C)OC(=O)CCCC(=O)Nc1ccc(cc1)N(C)C</chem>        | 1.07                     | 5.971             |
| 6  | <chem>C1=C[C@@H]([C@]23[C@](C1=O)([C@@H]1[C@@H](C[C@H]2O3)[C@@]2([C@](CC1)(C=C[C@@H]2OC(=O)C)[C@@H]([C@@H]1OC(=O)C(=C(C1)C)C)C)O)C)OC(=O)CCCC(=O)Nc1ccc(cc1)OC</chem>           | 0.44                     | 6.357             |
| 7  | <chem>C1=C[C@@H]([C@]23[C@](C1=O)([C@@H]1[C@@H](C[C@H]2O3)[C@@]2([C@](CC1)(C=C[C@@H]2OC(=O)C)[C@@H]([C@@H]1OC(=O)C(=C(C1)C)C)C)O)C)OC(=O)CCCC(=O)Nc1cc(c(cc1)N1CCOCC1)F</chem>  | 0.32                     | 6.495             |
| 8  | <chem>C1=C[C@@H]([C@]23[C@](C1=O)([C@@H]1[C@@H](C[C@H]2O3)[C@@]2([C@](CC1)(C=C[C@@H]2OC(=O)C)[C@@H]([C@@H]1OC(=O)C(=C(C1)C)C)C)O)C)OC(=O)CCCC(=O)Nc1scnn1</chem>                | 8.07                     | 5.093             |
| 9  | <chem>C1=C[C@@H]([C@]23[C@](C1=O)([C@@H]1[C@@H](C[C@H]2O3)[C@@]2([C@](CC1)(C=C[C@@H]2OC(=O)C)[C@@H]([C@@H]1OC(=O)C(=C(C1)C)C)C)O)C)OC(=O)CCCC(=O)Nc1scnn1</chem>                | 2.06                     | 5.686             |
| 10 | <chem>C1=C[C@@H]([C@]23[C@](C1=O)([C@@H]1[C@@H](C[C@H]2O3)[C@@]2([C@](CC1)(C=C[C@@H]2OC(=O)C)[C@@H]([C@@H]1OC(=O)C(=C(C1)C)C)C)O)C)OC(=O)CCCC(=O)Nc1sc2c(n1)cccc2</chem>        | 3.5                      | 5.456             |
| 11 | <chem>C1=C[C@@H]([C@]23[C@](C1=O)([C@@H]1[C@@H](C[C@H]2O3)[C@@]2([C@](CC1)(C=C[C@@H]2OC(=O)C)[C@@H]([C@@H]1OC(=O)C(=C(C1)C)C)C)O)C)OC(=O)CCCC(=O)Nc1ccc(cc1)F</chem>            | 1.87                     | 5.728             |
| 12 | <chem>C1=C[C@@H]([C@]23[C@](C1=O)([C@@H]1[C@@H](C[C@H]2O3)[C@@]2([C@](CC1)(C=C[C@@H]2OC(=O)C)[C@@H]([C@@H]1OC(=O)C(=C(C1)C)C)C)O)C)OC(=O)CCCC(=O)Nc1ccc(cc1)N(C)C</chem>        | 1.62                     | 5.79              |
| 13 | <chem>C1=C[C@@H]([C@]23[C@](C1=O)([C@@H]1[C@@H](C[C@H]2O3)[C@@]2([C@](CC1)(C=C[C@@H]2OC(=O)C)[C@@H]([C@@H]1OC(=O)C(=C(C1)C)C)C)O)C)OC(=O)CCCC(=O)Nc1ccc(cc1)OC</chem>           | 1.02                     | 5.991             |
| 14 | <chem>C1=C[C@@H]([C@]23[C@](C1=O)([C@@H]1[C@@H](C[C@H]2O3)[C@@]2([C@](CC1)(C=C[C@@H]2OC(=O)C)[C@@H]([C@@H]1OC(=O)C(=C(C1)C)C)C)O)C)OC(=O)CCCC(=O)Nc1cc(c(cc1)N1CCOCC1)F</chem>  | 1.66                     | 5.78              |
| 15 | <chem>C1=C[C@@H]([C@]23[C@](C1=O)([C@@H]1[C@@H](C[C@H]2O3)[C@@]2([C@](CC1)(C=C[C@@H]2OC(=O)C)[C@@H]([C@@H]1OC(=O)C(=C(C1)C)C)C)O)C)OC(=O)C=C(C(=O)Nc1scnn1</chem>               | 8.45                     | 5.073             |
| 16 | <chem>C1=C[C@@H]([C@]23[C@](C1=O)([C@@H]1[C@@H](C[C@H]2O3)[C@@]2([C@](CC1)(C=C[C@@H]2OC(=O)C)[C@@H]([C@@H]1OC(=O)C(=C(C1)C)C)C)O)C)OC(=O)C=C(C(=O)Nc1scnn1</chem>               | 1.83                     | 5.738             |
| 17 | <chem>C1=C[C@@H]([C@]23[C@](C1=O)([C@@H]1[C@@H](C[C@H]2O3)[C@@]2([C@](CC1)(C=C[C@@H]2OC(=O)C)[C@@H]([C@@H]1OC(=O)C(=C(C1)C)C)C)O)C)OC(=O)C=C(C(=O)Nc1ccc(cc1)F</chem>           | 1.32                     | 5.879             |
| 18 | <chem>C1=C[C@@H]([C@]23[C@](C1=O)([C@@H]1[C@@H](C[C@H]2O3)[C@@]2([C@](CC1)(C=C[C@@H]2OC(=O)C)[C@@H]([C@@H]1OC(=O)C(=C(C1)C)C)C)O)C)OC(=O)C=C(C(=O)Nc1ccc(cc1)N(C)C</chem>       | 1.56                     | 5.807             |
| 19 | <chem>C1=C[C@@H]([C@]23[C@](C1=O)([C@@H]1[C@@H](C[C@H]2O3)[C@@]2([C@](CC1)(C=C[C@@H]2OC(=O)C)[C@@H]([C@@H]1OC(=O)C(=C(C1)C)C)C)O)C)OC(=O)C=C(C(=O)Nc1ccc(cc1)OC</chem>          | 0.79                     | 6.102             |
| 20 | <chem>C1=C[C@@H]([C@]23[C@](C1=O)([C@@H]1[C@@H](C[C@H]2O3)[C@@]2([C@](CC1)(C=C[C@@H]2OC(=O)C)[C@@H]([C@@H]1OC(=O)C(=C(C1)C)C)C)O)C)OC(=O)C=C(C(=O)Nc1cc(c(cc1)N1CCOCC1)F</chem> | 1.38                     | 5.86              |
| 21 | <chem>FC1=CC=C(C=C1)C(CCCCNC(=O)NC1=CC=C(C=C1)Cl)C1=CC=C(C=C1)F</chem>                                                                                                          | 7.68                     | 5.115             |
| 22 | <chem>FC1=CC=C(C=C1)C(CCCCNC(=O)NC1=CC=C(C=C1)I)C1=CC=C(C=C1)F</chem>                                                                                                           | 11.79                    | 4.928             |
| 23 | <chem>FC1=CC=C(C=C1)C(CCCCNC(=O)NC1=CC=C(C=C1)[N+](=O)[O-])C1=CC=C(C=C1)F</chem>                                                                                                | 6.47                     | 5.189             |
| 24 | <chem>FC1=CC=C(C=C1)C(CCCCNC(=O)NC1=CC(=CC=C1)C(F)(F)F)C1=CC=C(C=C1)F</chem>                                                                                                    | 3.38                     | 5.471             |
| 25 | <chem>FC1=CC=C(C=C1)C(CCCCNC(=O)NC1=CC=C(C=C1)C(F)(F)F)C1=CC=C(C=C1)F</chem>                                                                                                    | 2.78                     | 5.556             |
| 26 | <chem>FC1=CC=C(C=C1)C(CCCCNC(=O)NC1=CC(=CC=C1)Cl)C1=CC=C(C=C1)F</chem>                                                                                                          | 5.07                     | 5.295             |
| 27 | <chem>FC1=CC=C(C=C1)C(CCCCNC(=O)NC1=CC(=CC=C1)[N+](=O)[O-])C1=CC=C(C=C1)F</chem>                                                                                                | 3.79                     | 5.421             |
| 28 | <chem>FC1=CC=C(C=C1)C(CCCCNC(=O)NC1=CC(=C(C=C1)Cl)C(F)(F)F)C1=CC=C(C=C1)F</chem>                                                                                                | 3.15                     | 5.502             |

|    |                                                                                           |        |       |
|----|-------------------------------------------------------------------------------------------|--------|-------|
| 29 | FC1=CC=C(C=C1)C(CCCCNC(=O)NC1=CC(=C(C=C1)Cl)[N+](=O)[O-])C1=CC=C(C=C1)F                   | 4.06   | 5.391 |
| 30 | NC=IC=C(C=CC1Cl)NC(=O)NCCCCC(C1=CC=C(C=C1)F)C1=CC=C(C=C1)F                                | 9.24   | 5.034 |
| 31 | FC1=CC=C(C=C1)C(CCCCNC(NC=IC=CC(=C(C1)NC(C)=O)Cl)=O)C1=CC=C(C=C1)F                        | 9.12   | 5.04  |
| 32 | FC1=CC=C(C=C1)C(CCCCNC(=O)NC1=CC(=C(C=C1)[N+](=O)[O-])Cl)C1=CC=C(C=C1)F                   | 3.47   | 5.46  |
| 33 | FC1=CC=C(C=C1)C(CCCCNC(=O)NC1=CC(=C(C=C1)[N+](=O)[O-])C(F)(F)F)C1=CC=C(C=C1)F             | 4.55   | 5.342 |
| 34 | FC1=CC=C(C=C1)C(CCCCNC(NC1=CC(=C(C(=O)OC)C=C1)C(F)(F)F)=O)C1=CC=C(C=C1)F                  | 4.43   | 5.354 |
| 35 | ClC1=C(C=C(C=C1)NC(=O)NCCCCC(C1=CC=C(C=C1)C)C1=CC=C(C=C1)C)C(F)(F)F                       | 2.51   | 5.6   |
| 36 | ClC1=CC=C(C=C1)NC(=O)NCCCCC(C1=CC=C(C=C1)C)C1=CC=C(C=C1)C                                 | 17.93  | 4.746 |
| 37 | COC1=CC=C(C=C1)C(CCCCNC(=O)NC1=CC(=C(C=C1)Cl)C(F)(F)F)C1=CC=C(C=C1)OC                     | 3.3    | 5.481 |
| 38 | COC1=CC=C(C=C1)C(CCCCNC(=O)NC1=CC(=C(C=C1)Cl)[N+](=O)[O-])C1=CC=C(C=C1)OC                 | 3.99   | 5.399 |
| 39 | FC(OC1=CC=C(C=C1)C(CCCCNC(=O)NC1=CC(=C(C=C1)Cl)C(F)(F)F)C1=CC=C(C=C1)OC(F)(F)F)(F)F       | 1.69   | 5.772 |
| 40 | ClC1=C(C=C(C=C1)NC(=O)NCCCCC(C1=CC=CC=C1)C1=CC=CC=C1)C(F)(F)F                             | 5.72   | 5.243 |
| 41 | [N+](=O)[O-]C1=CC=C(C=C1)C(CCCCNC(=O)NC1=CC(=C(C=C1)Cl)C(F)(F)F)C1=CC=C(C=C1)[N+](=O)[O-] | 1.23   | 5.91  |
| 42 | NC1=CC=C(C=C1)C(CCCCNC(=O)NC1=CC(=C(C=C1)Cl)C(F)(F)F)C1=CC=C(C=C1)N                       | 12.2   | 4.914 |
| 43 | FC1=CC=C(C=C1)N(CCCCNC(=O)NC1=CC(=C(C=C1)Cl)C(F)(F)F)C1=CC=C(C=C1)F                       | 5.04   | 5.298 |
| 44 | ClC1=C(C=C(C=C1)NC(=O)NCCCCC1=CC=C(C=C1)F)C(F)(F)F                                        | 5.44   | 5.264 |
| 45 | FC1=CC=C(C=C1)C(CCCNC(=O)NC1=CC(=C(C=C1)Cl)C(F)(F)F)C1=CC=C(C=C1)F                        | 3.5    | 5.456 |
| 46 | FC1=CC=C(C=C1)C(CCCCCNC(=O)NC1=CC(=C(C=C1)Cl)C(F)(F)F)C1=CC=C(C=C1)F                      | 2.57   | 5.59  |
| 47 | FC1=CC=C(C=C1)C(CCCCNC(=S)NC1=CC(=C(C=C1)Cl)C(F)(F)F)C1=CC=C(C=C1)F                       | 3.66   | 5.437 |
| 48 | ClC1=C(C=C(C=C1)NC(OCCCCC(C1=CC=C(C=C1)F)C1=CC=C(C=C1)F)=O)C(F)(F)F                       | 4.58   | 5.339 |
| 49 | FC1=CC=C(C=C1)C(CCCCN(C(=O)NC1=CC(=C(C=C1)Cl)C(F)(F)F)C1=CC=C(C=C1)F                      | 6.02   | 5.22  |
| 50 | ClC1=C(C=C(C=C1)NC(CCCCC(C1=CC=C(C=C1)F)C1=CC=C(C=C1)F)=O)C(F)(F)F                        | 11.44  | 4.942 |
| 51 | FC1=CC=C(C=C1)C(CCCCNC(C1=CC(=C(C=C1)Cl)C(F)(F)F)=O)C1=CC=C(C=C1)F                        | 11.71  | 4.931 |
| 52 | FC1=CC=C(C=C1)C(=C1CCN(CC1)C(=O)NC1=CC(=C(C=C1)Cl)C(F)(F)F)C1=CC=C(C=C1)F                 | 5.65   | 5.248 |
| 53 | FC1=CC=C(C=C1)C(C1CCN(CC1)C(=O)NC1=CC(=C(C=C1)Cl)C(F)(F)F)C1=CC=C(C=C1)F                  | 11.41  | 4.943 |
| 54 | FC1=CC=C(C=C1)C(CC1CCN(CC1)C(=O)NC1=CC(=C(C=C1)Cl)C(F)(F)F)C1=CC=C(C=C1)F                 | 4.84   | 5.315 |
| 55 | FC1=CC=C(C=C1)NC1=NC(=NC(=C1)C(F)(F)F)NC1=CC=C(C=C1)NS(=O)(=O)C1=C(C=CC=C1)OC(F)(F)F      | 20.837 | 4.681 |
| 56 | ClC1=C(C(=CC(=C1)C)OC)S(=O)(=O)NC1=CC=C(C=C1)NC1=NC(=CC(=N1)NC1=CC=C(C=C1)F)C(F)(F)F      | 27.783 | 4.556 |
| 57 | COC1=CC=C(C=C1)S(=O)(=O)NC1=CC=C(C=C1)NC1=NC(=CC(=N1)NC1=CC=C(C=C1)OC)C(F)(F)F            | 21.186 | 4.674 |
| 58 | COC1=CC=C(C=C1)NC1=NC(=NC(=C1)C(F)(F)F)NC1=CC=C(C=C1)NS(=O)(=O)C1=CC=C(C=C1)C(F)(F)F      | 23.293 | 4.633 |
| 59 | ClC1=C(C=CC=C1)S(=O)(=O)NC1=CC=C(C=C1)NC1=NC(=CC(=N1)NC1=CC=C(C=C1)OC)C(F)(F)F            | 43.568 | 4.361 |
| 60 | COC1=CC=C(C=C1)NC1=NC(=NC(=C1)C(F)(F)F)NC1=CC=C(C=C1)NS(=O)(=O)C1=C(C=CC=C1)OC(F)(F)F     | 32.946 | 4.482 |
| 61 | FC1=CC=C(C=C1)NC1=NC(=NC(=C1)C)NC1=CC=C(C=C1)NS(=O)(=O)C1=CC=C(C=C1)C(F)(F)F              | 17.547 | 4.756 |
| 62 | FC1=CC=C(C=C1)NC1=NC(=NC(=C1)C)NC1=CC=C(C=C1)NS(=O)(=O)C1=C(C=CC=C1)OC(F)(F)F             | 23.816 | 4.623 |
| 63 | ClC=IC=C(C=CC1)S(=O)(=O)NC1=CC=C(C=C1)NC1=NC(=CC(=N1)NC1=CC=C(C=C1)OC)C                   | 15.337 | 4.814 |
| 64 | COC1=CC=C(C=C1)S(=O)(=O)NC1=CC=C(C=C1)NC1=NC=CC(=N1)NC1=CC=C(C=C1)OC                      | 6.867  | 5.163 |
| 65 | COC1=CC=C(C=C1)NC1=NC(=NC(=C1)NC1=CC=C(C=C1)NS(=O)(=O)C1=CC=C(C=C1)C(F)(F)F               | 27.194 | 4.566 |
| 66 | COC1=CC=C(C=C1)NC1=NC(=NC(=C1)NC1=CC=C(C=C1)NS(=O)(=O)C1=CC=C(C=C1)C                      | 21.229 | 4.673 |
| 67 | COC1=CC(NC2=CC=NC(NC3=CC=C(NS(=O)(=O)C4=CC=C(C)C=C4)C=C3)=N2)=CC(OC)=C1OC                 | 17.304 | 4.762 |
| 68 | COC1=CC=C(C=C1)S(=O)(=O)NC1=CC=C(C=C1)NC1=NC=CC(=N1)NC1=CC(=C(C(=C1)OC)OC)OC              | 5.986  | 5.223 |
| 69 | COC1=CC=C(C(=O)NC2=CC=C(C=C2)NC2=NC=CC(=N2)NC2=C(C=C(C=C2)OC)C)C=C1                       | 23.251 | 4.634 |
| 70 | COC1=C(C(=O)NC2=CC=C(C=C2)NC2=NC(=CC(=N2)C)NC2=CC(=C(C(=C2)OC)OC)OC)C=CC=C1               | 7.198  | 5.143 |
| 71 | CN1C=NC2=CC=C(C=C2C1=O)C=IC=CC2=C(NC(=N2)NC(CC)=O)C1                                      | 13.5   | 4.87  |
| 72 | CN1C(=NC2=CC=C(C=C2C1=O)C=IC=CC2=C(NC(=N2)NC(CC)=O)C1)CN1CCOCC1                           | 0.94   | 6.027 |
| 73 | O1CCN(CC1)CCN1C=NC2=CC=C(C=C2C1=O)C=IC=CC2=C(NC(=N2)NC(CC)=O)C1                           | 0.38   | 6.42  |
| 74 | O=C1N(C=NC2=CC=C(C=C12)C=IC=CC2=C(NC(=N2)NC(CC)=O)C1)CCN1CCCCC1                           | 1.23   | 5.91  |
| 75 | O1CCN(CC1)CCN1C=NC2=CC=C(C=C2C1=O)C=IC=CC2=C(NC(=N2)NC(CCCC)=O)C1                         | 3.85   | 5.415 |
| 76 | O1CCN(CC1)CCCN1C=NC2=CC=C(C=C2C1=O)C=IC=CC2=C(NC(=N2)NC(CC)=O)C1                          | 1.22   | 5.914 |
| 77 | CN(C(=O)NC1=NC2=C(N1)C=C(C=C2)C=2C=C1C(N(C=NC1=CC2)CCN2CCOCC2)=O)C                        | 4.85   | 5.314 |

|     |                                                                                                 |       |       |
|-----|-------------------------------------------------------------------------------------------------|-------|-------|
| 78  | <chem>C(C)N(C(=O)NC1=NC2=C(N1)C=C(C=C2)C=2C=C1C(N(C=NC1=CC2)CCN2CCOCC2)=O)CC</chem>             | 1.76  | 5.754 |
| 79  | <chem>O1CCN(CC1)CCN1C=NC2=CC=C(C=C2C1=O)C=1C=CC2=C(NC(=N2)NC(=O)C2CC2)C1</chem>                 | 1.61  | 5.793 |
| 80  | <chem>O1CCN(CC1)CCN1C=NC2=CC=C(C=C2C1=O)C=1C=CC2=C(NC(=N2)NC(=O)C2CCCCC2)C1</chem>              | 10.2  | 4.991 |
| 81  | <chem>N1C=C(C2=CC=CC=C12)CCN1C=NC2=CC=C(C=C2C1=O)C=1C=CC2=C(NC(=N2)NC(CC)=O)C1</chem>           | 0.55  | 6.26  |
| 82  | <chem>NC1=C(C=CC=C1)NC(C1=CC=C(C=C1)CN1C2=NC(=NC(=C2N=C1)NC1=CC(=C(C=C1)F)Cl)Cl)=O</chem>       | 3.24  | 5.489 |
| 83  | <chem>NC1=C(C=CC=C1)NC(C1=CC=C(C=C1)CN1C2=NC(=NC(=C2N=C1)NC1=NNC=C1C)Cl)=O</chem>               | 4.64  | 5.333 |
| 84  | <chem>NC1=C(C=CC=C1)NC(C1=CC=C(C=C1)CN1C=CC2=C1N=C(N=C2Cl)Cl)=O</chem>                          | 7.65  | 5.116 |
| 85  | <chem>NC1=NC2=C(N=CN2CC2=CC=C(C=C2)C(=O)NC2=C(N)C=CC=C2)C(Cl)=N1</chem>                         | 3.08  | 5.511 |
| 86  | <chem>NC1=NC(=C2N=CN(C2=N1)CC1=CC=C(C(=O)NC2=C(C=CC=C2)N)C=C1)NC1=CC(=C(C=C1)F)Cl</chem>        | 1.48  | 5.83  |
| 87  | <chem>NC1=NC(=C2N=CN(C2=N1)CC1=CC=C(C(=O)NC2=C(C=CC=C2)N)C=C1)NC1=CC(=CC(=C1)OC)OC</chem>       | 3.17  | 5.499 |
| 88  | <chem>NC=1N=C(C2=C(N1)N(C=C2)CC2=CC=C(C(=O)NC1=C(C=CC=C1)N)C=C2)NC2=CC(=C(C=C2)F)Cl</chem>      | 5.32  | 5.274 |
| 89  | <chem>NC=1N=C(C2=C(N1)N(C=C2)CC2=CC=C(C(=O)NC1=C(C=CC(=C1)F)N)C=C2)Cl</chem>                    | 3.78  | 5.423 |
| 90  | <chem>FC=1C(NC(N(C1)CC(=O)NC1=C(C=CC(=C1)S(N)(=O)=O)O)=O)</chem>                                | 25.46 | 4.594 |
| 91  | <chem>C1C1=CC=C(CN(C(CN2C(NC(C(=C2)F)=O)=O)=O)CCC2=CC=C(C=C2)S(N)(=O)=O)C=C1</chem>             | 40.92 | 4.388 |
| 92  | <chem>FC=1C(NC(N(C1)CC(=O)N(CCC1=CC=C(C=C1)S(N)(=O)=O)CC1=CC=C(C=C1)OC)=O)</chem>               | 6.86  | 5.164 |
| 93  | <chem>FC=1C(NC(N(C1)CC=1N=NN(C1)C1=CC=C(C=C1)S(=O)(=O)N)=O)</chem>                              | 22.85 | 4.641 |
| 94  | <chem>FC=1C(NC(N(C1)CC(=O)NC1=CC=C2C(=CC(OC2=C1)=O)C)=O)</chem>                                 | 32.04 | 4.494 |
| 95  | <chem>N1C=C(C2=CC=CC=C12)SC1=NC(=NC(=C1)N1CCOCC1)NC(=O)NC1=CC=CC=C1</chem>                      | 12.14 | 4.916 |
| 96  | <chem>N1C=C(C2=CC=CC=C12)SC1=NC(=NC(=C1)N1CCOCC1)NC(=O)NC1=CC(=CC=C1)OC</chem>                  | 7.94  | 5.1   |
| 97  | <chem>N1C=C(C2=CC=CC=C12)SC1=NC(=NC(=C1)N1CCOCC1)NC(=O)NC1=CC(=CC=C1)Cl</chem>                  | 6.93  | 5.159 |
| 98  | <chem>N1C=C(C2=CC=CC=C12)SC1=NC(=NC(=C1)N1CCOCC1)NC(=O)NC1=C(C=C(C=C1)Cl)C</chem>               | 8.65  | 5.063 |
| 99  | <chem>N1C=C(C2=CC=CC=C12)SC1=NC(=NC(=C1)N1CCCCC1)NC(=O)NC1=C(C=CC(=C1)C)C</chem>                | 5.94  | 5.226 |
| 100 | <chem>N1C=C(C2=CC=CC=C12)SC1=NC(=NC(=C1)N1CCCCC1)NC(=O)NC1=CC=C(C=C1)Cl</chem>                  | 10.13 | 4.994 |
| 101 | <chem>N1C=C(C2=CC=CC=C12)SC1=NC(=NC(=C1)N1CCCCC1)NC(=O)NC1=CC=C(C=C1)OC</chem>                  | 7.26  | 5.139 |
| 102 | <chem>N1C=C(C2=CC=CC=C12)SC1=NC(=NC(=C1)N1CCCCC1)NC(=O)NC1=CC=CC=C1</chem>                      | 8.13  | 5.09  |
| 103 | <chem>N1C=C(C2=CC=CC=C12)SC1=NC(=NC(=C1)N1CCCCC1)NC(=O)NC1=CC=CC=C1</chem>                      | 7.89  | 5.103 |
| 104 | <chem>N1C=C(C2=CC=CC=C12)SC1=NC(=NC(=C1)N1CCCCC1)NC(=O)NC1=CC=C(C=C1)OC</chem>                  | 13.1  | 4.883 |
| 105 | <chem>N1C=C(C2=CC=CC=C12)SC1=NC(=NC(=C1)N1CCCCC1)NC(=O)NC1=CC=C(C=C1)Cl</chem>                  | 5.85  | 5.233 |
| 106 | <chem>N1C=C(C2=CC=CC=C12)SC1=NC(=NC(=C1)N1CCCCC1)NC(=O)NC1=C(C=C(C=C1)Cl)C</chem>               | 9.44  | 5.025 |
| 107 | <chem>N1C=C(C2=CC=CC=C12)SC1=NC(=NC(=C1)NC1=CC=CC=C1)NC(=O)NC1=CC=CC=C1</chem>                  | 35.92 | 4.445 |
| 108 | <chem>N1C=C(C2=CC=CC=C12)SC1=NC(=NC(=C1)N1CCN(CC1)C1=NC=CC=C1)NC(=O)NC1=CC=CC=C1</chem>         | 19.51 | 4.71  |
| 109 | <chem>N1C=C(C2=CC=CC=C12)SC1=NC(=NC(=C1)N1CCN(CC1)C1=NC=CC=C1)NC(=O)NC1=CC=C(C=C1)OC</chem>     | 28.42 | 4.546 |
| 110 | <chem>N1C=C(C2=CC=CC=C12)SC1=NC(=NC(=C1)N1CCN(CC1)C1=NC=CC=C1)NC(=O)NC1=C(C=C(C=C1)C)C</chem>   | 34.7  | 4.46  |
| 111 | <chem>N1C=C(C2=CC=CC=C12)SC1=NC(=NC(=C1)N1CCN(CC1)CC1=CC=CC=C1)NC(=O)NC1=CC=CC=C1</chem>        | 10.22 | 4.991 |
| 112 | <chem>N1C=C(C2=CC=CC=C12)SC1=NC(=NC(=C1)N1CCN(CC1)CC1=CC=CC=C1)NC(=O)NC1=CC(=CC(=C1)C)C</chem>  | 18.96 | 4.722 |
| 113 | <chem>N1C=C(C2=CC=CC=C12)SC1=NC(=NC(=C1)N1CCN(CC1)CC1=CC=CC=C1)NC(=O)NC1=C(C=C(C=C1)Cl)C</chem> | 22.13 | 4.655 |
| 114 | <chem>N1C=C(C2=CC=CC=C12)SC1=NC(=NC(=C1)N1CCN(CC1)CC1=CC=CC=C1)NC(=O)NC1=CC=C(C=C1)OC</chem>    | 8.92  | 5.05  |
| 115 | <chem>N1C=C(C2=CC=CC=C12)SC1=NC(=NC(=C1)NC1CC1)NC(=O)NC1=C(C=C(C=C1)Cl)C</chem>                 | 14.61 | 4.835 |
| 116 | <chem>N1C=C(C2=CC=CC=C12)SC1=NC(=NC(=C1)NC1CC1)NC(=O)NC1=CC=CC=C1</chem>                        | 7.86  | 5.105 |
| 117 | <chem>N1C=C(C2=CC=CC=C12)SC1=NC(=NC(=C1)NC1=CC=CC=C1)NC(=O)NC1=CC=C(C=C1)C</chem>               | 13.42 | 4.872 |
| 118 | <chem>N1C=C(C2=CC=CC=C12)SC1=NC(=NC(=C1)NC1=CC=CC=C1)NC(=O)NC1=C(C=C(C=C1)Cl)C</chem>           | 17.1  | 4.767 |
| 119 | <chem>N1C=C(C2=CC=CC=C12)SC1=NC(=NC(=C1)NC1=CC(=CC(=C1)OC)OC)NC(=O)NC1=CC=C(C=C1)OC</chem>      | 9.46  | 5.024 |
| 120 | <chem>N1C=C(C2=CC=CC=C12)SC1=NC(=NC(=C1)NC1=CC=C(C=C1)Cl)NC(=O)NC1=CC=CC=C1</chem>              | 10.26 | 4.989 |
| 121 | <chem>COC1=C(C=CC=C1)C1=CSC2=C1N=C(N=C2)NC2=CC=C(CP(OC)(OC)=O)C=C2</chem>                       | 7.81  | 5.107 |
| 122 | <chem>COC1=C(C=CC=C1)C1=CSC2=C1N=C(N=C2)NC2=CC=C(CP(OCC)(OCC)=O)C=C2</chem>                     | 4.94  | 5.306 |
| 123 | <chem>COC1=C(C=CC=C1)C1=CSC2=C1N=C(N=C2)NC2=CC=C(CP(OCC)(=O)NC)C=C2</chem>                      | 1.21  | 5.917 |
| 124 | <chem>OC(C1=CC=C(C=C1)NC=1N=CC2=C(N1)C(=CS2)C2=C(C=CC=C2)OC)P(OCC)(OCC)=O</chem>                | 2.64  | 5.578 |
| 125 | <chem>COC1=C(C=CC=C1)C1=CSC2=C1N=C(N=C2)NC2=CC=C(CP(OCC)(=O)N1CCOCC1)C=C2</chem>                | 8.35  | 5.078 |
| 126 | <chem>COC1=C(C=CC=C1)C1=CSC2=C1N=C(N=C2)NC2=CC=C(C(=O)NC)C=C2</chem>                            | 2.12  | 5.674 |

|     |                                                                                                    |      |       |
|-----|----------------------------------------------------------------------------------------------------|------|-------|
| 127 | <chem>COC1=C(C=CC=C1)C1=CSC2=C1N=C(N=C2)NC2=CC=C(C(=O)NC1CCNCC1)C=C2</chem>                        | 0.11 | 6.959 |
| 128 | <chem>COC1=C(C=CC=C1)C1=CSC2=C1N=C(N=C2)NC2=CC=C(C=C2)NC(=O)C2CCNCC2</chem>                        | 1.05 | 5.979 |
| 129 | <chem>COC1=C(C=CC=C1)C1=CSC2=C1N=C(N=C2)NC2=CC=C(C=C2)NC(=O)[C@H]2CNCCC2</chem>                    | 0.44 | 6.357 |
| 130 | <chem>COC1=C(C=CC=C1)C1=CSC2=C1N=C(N=C2)NC2=CC=C(C=C2)NC(=O)[C@H]2CNCCC2</chem>                    | 0.41 | 6.387 |
| 131 | <chem>NCC(=O)NC1=CC=C(C=C1)NC=IN=CC2=C(N1)C(=CS2)C2=C(C=CC=C2)OC</chem>                            | 2.77 | 5.558 |
| 132 | <chem>FC=IC=C(C(=O)NC2CCNCC2)C=CC1NC=IN=CC2=C(N1)C(=CS2)C2=C(C=CC=C2)OC</chem>                     | 1.61 | 5.793 |
| 133 | <chem>COC1=C(C=CC=C1)C1=CSC2=C1N=C(N=C2)NC2=C(C=C(C(=O)NC1CCNCC1)C=C2)C</chem>                     | 3.24 | 5.489 |
| 134 | <chem>COC=IC=C(C(=O)NC2CCNCC2)C=CC1NC=IN=CC2=C(N1)C(=CS2)C2=C(C=CC=C2)OC</chem>                    | 2.24 | 5.65  |
| 135 | <chem>C(C)OC=IC=C(C(=O)NC2CCNCC2)C=CC1NC=IN=CC2=C(N1)C(=CS2)C2=C(C=CC=C2)OC</chem>                 | 4.39 | 5.358 |
| 136 | <chem>COC1=C(C=CC=C1)C1=CSC2=C1N=C(N=C2)NC2=C(C=C(C(=O)NC1CCNCC1)C=C2)C(F)(F)F</chem>              | 2.75 | 5.561 |
| 137 | <chem>FC1=C(C(=O)NC2CCNCC2)C=CC(=C1)NC=IN=CC2=C(N1)C(=CS2)C2=C(C=CC=C2)OC</chem>                   | 0.19 | 6.721 |
| 138 | <chem>COC1=C(C=CC=C1)C1=CSC2=C1N=C(N=C2)NC2=CC(=C(C(=O)NC1CCNCC1)C=C2)C</chem>                     | 0.24 | 6.62  |
| 139 | <chem>FC1=C(C(=O)NC2CCNCC2)C=C(C(=C1)NC=IN=CC2=C(N1)C(=CS2)C2=C(C=CC=C2)OC)OC</chem>               | 1.16 | 5.936 |
| 140 | <chem>FC1=C(C(=O)NC2CCNCC2)C=C(C(=C1)NC=IN=CC2=C(N1)C(=CS2)C2=C(C=CC=C2)OC)F</chem>                | 2.57 | 5.59  |
| 141 | <chem>FC1=C(C(=O)NC2CCOCC2)C=CC(=C1)NC=IN=CC2=C(N1)C(=CS2)C2=C(C=CC=C2)OC</chem>                   | 5.35 | 5.272 |
| 142 | <chem>FC1=C(C(=O)NC2CCN(CC2)C)C=CC(=C1)NC=IN=CC2=C(N1)C(=CS2)C2=C(C=CC=C2)OC</chem>                | 0.35 | 6.456 |
| 143 | <chem>FC1=C(C(=O)N[C@@H]2CNCC2)C=CC(=C1)NC=IN=CC2=C(N1)C(=CS2)C2=C(C=CC=C2)OC</chem>               | 0.56 | 6.252 |
| 144 | <chem>FC1=C(C(=O)N[C@H]2CNCC2)C=CC(=C1)NC=IN=CC2=C(N1)C(=CS2)C2=C(C=CC=C2)OC</chem>                | 0.26 | 6.585 |
| 145 | <chem>FC1=C(C(=O)NCC2CCNCC2)C=CC(=C1)NC=IN=CC2=C(N1)C(=CS2)C2=C(C=CC=C2)OC</chem>                  | 1.53 | 5.815 |
| 146 | <chem>FC1=C(C(=O)NC[C@H]2CNCCC2)C=CC(=C1)NC=IN=CC2=C(N1)C(=CS2)C2=C(C=CC=C2)OC</chem>              | 2.89 | 5.539 |
| 147 | <chem>FC1=C(C(=O)NC[C@@H]2CNCCC2)C=CC(=C1)NC=IN=CC2=C(N1)C(=CS2)C2=C(C=CC=C2)OC</chem>             | 8.62 | 5.064 |
| 148 | <chem>CSC1=CC=C(C=C1)C(C=C\C1=CC=C(C=C1)N1CCOCC1)=O</chem>                                         | 6.14 | 5.212 |
| 149 | <chem>COC=IC=C(C=CC1)C(C=C\C1=CC=C(C=C1)N1CCCC1)=O</chem>                                          | 3    | 5.523 |
| 150 | <chem>O1COC2=C1C=CC(=C2)C(C=C\C2=CC=C(C=C2)N2CCCC2)=O</chem>                                       | 4.8  | 5.319 |
| 151 | <chem>ClCCN(C1=CC=C(C=C1)/C=C/C(=O)C1=C(C=CC=C1)OC)CCCl</chem>                                     | 1.99 | 5.701 |
| 152 | <chem>ClCCN(C1=CC=C(C=C1)/C=C/C(=O)C1=CC=C(C=C1)S(=O)(=O)C)CCCl</chem>                             | 5.71 | 5.243 |
| 153 | <chem>ClCCN(C1=CC=C(C=C1)/C=C/C(=O)C1=CC(=CC=C1)OC)CCCl</chem>                                     | 2.86 | 5.544 |
| 154 | <chem>CNC(=O)C1=CC=C(C=C1)C(C=C1)C(COC3=CC=CC4=C3N=C(C)C=C4OCC3=NC=C(C=C3)=C(C1)C=C2)C=C1</chem>   | 0.08 | 7.097 |
| 155 | <chem>CN(C(=O)CN1C(=O)C2=C(C=CC=C2)C1=O)C1=C(Cl)C(CO)=C(Cl)C=C1</chem>                             | 0.78 | 6.108 |
| 156 | <chem>CNC(=O)C1=CC=C(C=C1)C(C(=O)C1=O)C=C1</chem>                                                  | 86   | 4.066 |
| 157 | <chem>COC1=C(O)C=CC(C=C1)C(C=C1)C(COC3=CC=CC4=C3N=C(C)C=C4OCC3=NC=C(C=C3)=C(C1)C=C2)C=C1</chem>    | 5.9  | 5.229 |
| 158 | <chem>CNC(=O)C1=CC=C(C=C1)C(C=C1)C(COC3=CC=CC4=C3N=C(C)C=C4OCC3=NC=C(C=C3)=C(C1)C=C2)C=C1</chem>   | 0.43 | 6.367 |
| 159 | <chem>CC1=NC2=C(C=CC=C2OCC2=CC=CC(OC3=CC=CC=C3)=C2)C(OCC2=NC=CC=C2)=C1</chem>                      | 6.97 | 5.157 |
| 160 | <chem>CC1=NC2=C(C=CC=C2N)C(OCC2=NC=CC=C2)=C1</chem>                                                | 22   | 4.658 |
| 161 | <chem>C(C)(C)(C)N1N=C2C(=C1)OC1(CC2=O)CCN(CC1)C(=O)C1=CC(=NC2=CC=CC=C12)C1=CC(=C(C=C1)OC)OC</chem> | 7.13 | 5.147 |
| 162 | <chem>NC1=CC=C(C=C1)C1=NC2=CC=CC=C2C(=C1)C(=O)N1CCC2(CC(C3=NN(C=C3O2)C(C)(C)C)=O)CC1</chem>        | 4.96 | 5.305 |
| 163 | <chem>C(C)(C)(C)N1N=C2C(=C1)OC1(CC2=O)CCN(CC1)C(=O)C1=CC(=NC2=CC=CC=C12)C1=NC=CC=C1</chem>         | 8.1  | 5.092 |
| 164 | <chem>C(C)(C)(C)N1N=C2C(=C1)OC1(CC2=O)CCN(CC1)C(=O)C1=CC(=NC2=CC=CC=C12)C1=CC=NC=C1</chem>         | 1.65 | 5.783 |
| 165 | <chem>C(C)(C)(C)N1N=C2C(=C1)OC1(CC2=O)CCN(CC1)C(=O)C1=CC(=NC2=CC=CC=C12)N1CCNCC1</chem>            | 4.2  | 5.377 |
| 166 | <chem>C(C)(C)(C)N1N=C2C(=C1)OC1(CC2=O)CCN(CC1)C(=O)C1=CC(=NC2=CC=CC=C12)N1CCN(CC1)C</chem>         | 8.13 | 5.09  |
| 167 | <chem>C(C)(C)(C)N1N=C2C(=C1)OC1(CC2=O)CCN(CC1)C(=O)C1=CC(=NC2=CC=CC=C12)N1CCOCC1</chem>            | 3.18 | 5.498 |
| 168 | <chem>C(C)(C)(C)N1N=C2C(=C1)OC1(CC2=O)CCN(CC1)C(=O)C1=CC(=NC2=CC=CC=C12)C</chem>                   | 4.86 | 5.313 |
| 169 | <chem>C(C)(C)(C)N1N=C2C(=C1)OC1(CC2=O)CCN(CC1)C(=O)C1=CC(=NC2=CC=CC=C12)Cl</chem>                  | 9.22 | 5.035 |
| 170 | <chem>C1(=CC=CC2=CC=CC=C12)C1=NN(C(=N1)N1C(COC12C=CC(C=C2)=O)=O)C2=CC=CC=C2</chem>                 | 0.05 | 7.301 |
| 171 | <chem>CC1OC2(N(C1=O)C1=NC(=NN1C1=CC=CC=C1)C1=CC=CC3=CC=CC=C13)C=CC(C=C2)=O</chem>                  | 0.10 | 7.000 |
| 172 | <chem>C1(=CC=CC2=CC=CC=C12)C1=NN(C(=N1)N1C(COC12C=CC(C=C2)=O)=O)C2=CC=C(C=C2)C</chem>              | 0.04 | 7.398 |
| 173 | <chem>C1(=CC=CC2=CC=CC=C12)C1=NN(C(=N1)N1C(COC12C=CC(C=C2)=O)=O)C2=C(C=CC=C2)C</chem>              | 0.12 | 6.921 |
| 174 | <chem>C1=C(C=CC2=CC=CC=C12)C1=NN(C(=N1)N1C(COC12C=CC(C=C2)=O)=O)C2=CC=CC=C2</chem>                 | 0.07 | 7.155 |
| 175 | <chem>CC1OC2(N(C1=O)C1=NC(=NN1C1=CC=CC=C1)C1=CC3=CC=CC=C3C=C1)C=CC(C=C2)=O</chem>                  | 0.07 | 7.155 |

|     |                                                                                       |       |       |
|-----|---------------------------------------------------------------------------------------|-------|-------|
| 176 | CC1OC2(N(C1=O)C1=NC(=NN1C1=CC=C(C=C1)C)C1=CC3=CC=CC=C3C=C1)C=CC(C=C2)=O               | 0.10  | 7.000 |
| 177 | C1C1=CC=C(C=C1)N1N=C(N=C1N1C(COC12C=CC(C=C2)=O)=O)C2=CC1=CC=CC=C1C=C2                 | 0.07  | 7.155 |
| 178 | C1=C(C=CC2=CC=CC=C12)C1=NN(C(=N1)N1C(COC12C=CC(C=C2)=O)=O)C2=CC=C(C=C2)C(F)(F)F       | 0.07  | 7.155 |
| 179 | COC1=CC=C(C=C1)N1N=C(N=C1N1C(COC12C=CC(C=C2)=O)=O)C2=CC1=CC=CC=C1C=C2                 | 0.06  | 7.222 |
| 180 | COC1=CC=C(C=C1)N1N=C(N=C1N1C(C(OC12C=CC(C=C2)=O)C)=O)C2=CC1=CC=CC=C1C=C2              | 0.05  | 7.301 |
| 181 | C1=C(C=CC2=CC=CC=C12)N1N=C(N=C1N1C(COC12C=CC(C=C2)=O)=O)C2=CC1=CC=CC=C1C=C2           | 0.05  | 7.301 |
| 182 | C1=C(C=CC2=CC=CC=C12)N1N=C(N=C1N1C(C(OC12C=CC(C=C2)=O)C)=O)C2=CC1=CC=CC=C1C=C2        | 0.06  | 7.222 |
| 183 | BrC1=C(C=CC2=CC=CC=C12)C1=NN(C(=N1)N1C(COC12C=CC(C=C2)=O)=O)C2=CC=CC=C2               | 0.05  | 7.301 |
| 184 | O1C2=C(OCC1)C=C(C=C2)C2=NN(C(=N2)N2C(COC21C=CC(C=C1)=O)=O)C1=CC=CC=C1                 | 0.10  | 7.000 |
| 185 | C1(=CC=CC=C1)N1N=C(N=C1N1C(COC12C=CC(C=C2)=O)=O)C2=C1C=CC=NC1=CC2                     | 0.05  | 7.301 |
| 186 | FC1=CC=C(C2=CC=CC=C12)C1=NN(C(=N1)N1C(COC12C=CC(C=C2)=O)=O)C2=CC=CC=C2                | 0.08  | 7.097 |
| 187 | C1=C(C=CC=2C3=CC=CC=C3CC12)C1=NN(C(=N1)N1C(COC12C=CC(C=C2)=O)=O)C2=CC=CC=C2           | 0.07  | 7.155 |
| 188 | C1=C(C=CC=2C3=CC=CC=C3CC12)C1=NN(C(=N1)N1C(COC12C=CC(C=C2)=O)=O)C2=CC=C(C=C2)C(F)(F)F | 0.08  | 7.097 |
| 189 | C1(=CC=CC2=CC=CC=C12)C1=NN(C(=N1)N1CCOC12C=CC(C=C2)=O)C2=CC=CC=C2                     | 0.11  | 6.959 |
| 190 | C1(=CC=CC2=CC=CC=C12)C1=NN(C(=N1)N1CCOC12C=CC(C=C2)=O)C2=CC=C(C=C2)C                  | 0.26  | 6.585 |
| 191 | C1=C(C=CC2=CC=CC=C12)C1=NN(C(=N1)N1CCOC12C=CC(C=C2)=O)C2=CC=CC=C2                     | 0.23  | 6.638 |
| 192 | CC1OC2(N(C1)C1=NC(=NN1C1=CC=CC=C1)C1=CC3=CC=CC=C3C=C1)C=CC(C=C2)=O                    | 0.13  | 6.886 |
| 193 | C1=C(C=CC2=CC=CC=C12)C1=NN(C(=N1)N1CCOC12C=CC(C=C2)=O)C2=CC=C(C=C2)C                  | 0.16  | 6.796 |
| 194 | S1C(=NC2=C1C=CC=C2)NC2=NC(=NC=C2C)NC2=CC=C(C=C2)[N+](=O)[O-]                          | 22.49 | 4.648 |
| 195 | S1C(=NC2=C1C=CC=C2)NC2=NC(=NC=C2C)NC2=CC=C(C=C2)S(=O)(=O)C                            | 14.76 | 4.831 |
| 196 | S1C(=NC2=C1C=CC=C2)NC2=NC(=NC=C2C)NC2=CC=C(C=C2)S(=O)(=O)N                            | 16.75 | 4.776 |
| 197 | S1C(=NC2=C1C=CC=C2)NC2=NC(=NC=C2C)NC2=CC=C(C=C2)N2CCCCC2                              | 37.23 | 4.429 |
| 198 | FC1=CC2=C(N=C(S2)NC2=NC(=NC=C2C)NC2=CC=C(C=C2)S(=O)(=O)N)C=C1                         | 7.58  | 5.12  |
| 199 | C1C1=CC2=C(N=C(S2)NC2=NC(=NC=C2C)NC2=CC=C(C=C2)S(=O)(=O)C)C=C1                        | 5.9   | 5.229 |
| 200 | C1C1=CC2=C(N=C(S2)NC2=NC(=NC=C2C)NC2=CC=C(C=C2)S(=O)(=O)N)C=C1                        | 9.42  | 5.026 |
| 201 | CC=1C(=NC(=NC1)NC1=CC=C(C=C1)S(=O)(=O)N)NC=1SC2=C(N1)C=CC(=C2)C                       | 9.08  | 5.042 |
| 202 | S1C(=NC2=C1C=CC=C2)NC2=NC(=NC=C2F)NC2=CC=C(C=C2)S(=O)(=O)C                            | 4.98  | 5.303 |
| 203 | S1C(=NC2=C1C=CC=C2)NC2=NC(=NC=C2F)NC2=CC=C(C=C2)S(=O)(=O)N                            | 22.63 | 4.645 |
| 204 | FC=1C(=NC(=NC1)NC1=CC=C(C=C1)S(=O)(=O)C)NC=1SC2=C(N1)C=CC(=C2)F                       | 8.9   | 5.051 |
| 205 | C1C1=CC2=C(N=C(S2)NC2=NC(=NC=C2F)NC2=CC=C(C=C2)S(=O)(=O)N)C=C1                        | 2.79  | 5.554 |
| 206 | C1C1=CC2=C(N=C(S2)NC2=NC(=NC=C2F)NC2=CC=C(C=C2)S(=O)(=O)C)C=C1                        | 11.05 | 4.957 |
| 207 | FC=1C(=NC(=NC1)NC1=CC=C(C=C1)S(=O)(=O)N)NC=1SC2=C(N1)C=CC(=C2)C                       | 6.39  | 5.194 |
| 208 | FC=1C(=NC(=NC1)NC1=CC=C(C=C1)S(=O)(=O)C)NC=1SC2=C(N1)C=CC(=C2)C                       | 14.33 | 4.844 |
| 209 | FC=1C(=NC(=NC1)NC1=CC=C(C=C1)S(=O)(=O)N)NC=1SC2=C(N1)C=CC(=C2)OC                      | 26.6  | 4.575 |
| 210 | FC=1C(=NC(=NC1)NC1=CC=C(C=C1)S(=O)(=O)C)NC=1SC2=C(N1)C=CC(=C2)OC                      | 4.74  | 5.324 |
| 211 | S1C(=NC2=C1C=CC=C2)NC2=NC(=NC=C2)NC2=CC=C(C=C2)S(=O)(=O)C                             | 5.91  | 5.228 |
| 212 | S1C(=NC2=C1C=CC=C2)NC2=NC(=NC=C2)NC2=CC=C(C=C2)S(=O)(=O)N                             | 5.00  | 5.301 |
| 213 | FC1=CC2=C(N=C(S2)NC2=NC(=NC=C2)NC2=CC=C(C=C2)S(=O)(=O)C)C=C1                          | 2.08  | 5.682 |
| 214 | FC1=CC2=C(N=C(S2)NC2=NC(=NC=C2)NC2=CC=C(C=C2)S(=O)(=O)N)C=C1                          | 1.80  | 5.745 |
| 215 | CC1=CC2=C(N=C(S2)NC2=NC(=NC=C2)NC2=CC=C(C=C2)S(=O)(=O)N)C=C1                          | 3.87  | 5.412 |
| 216 | CS(=O)(=O)C1=CC=C(C=C1)NC1=NC=CC(=N1)NC=1SC2=C(N1)C=CC(=C2)C                          | 4.44  | 5.353 |
| 217 | COC1=CC2=C(N=C(S2)NC2=NC(=NC=C2)NC2=CC=C(C=C2)S(=O)(=O)N)C=C1                         | 6.24  | 5.205 |
| 218 | CS(=O)(=O)C1=CC=C(C=C1)NC1=NC=CC(=N1)NC=1SC2=C(N1)C=CC(=C2)OC                         | 32.74 | 4.485 |
| 219 | CC(C)N1C(C)=NC=C1C1=CC=NC(NC2=CC=C(C=C2)S(C)(=O)=O)=N1                                | 7.20  | 5.143 |

➤ Statistical parameters for used for validation of QSAR models

$$R^2 = 1 - \frac{\sum(y_i - \hat{y}_i)^2}{\sum(y_i - \bar{y})^2}$$

Where,  $y_i$  are the observed values of the response,  $\bar{y}$  the corresponding average,  $\hat{y}$  are the calculated values

$$Q^2 = 1 - \frac{\sum (y_i - \hat{y}_i)^2}{\sum (y_i - \bar{y})^2}$$

Where,  $y_i$  are the observed values of the response,  $\bar{y}$  the corresponding average,  $\hat{y}$  are the values predicted for each object when it is not in the training set.

$$Q_{F1}^2 = 1 - \frac{\sum_{i=1}^{n_{EXT}} (y_i - \hat{y}_i)^2}{\sum_{i=1}^{n_{EXT}} (y_i - \bar{y}_{TR})^2}$$

Where,  $y_i$  are the observed values of the response,  $\bar{y}$  the corresponding average,  $\hat{y}$  are the calculated values

$$Q_{F2}^2 = 1 - \frac{\sum_{i=1}^{n_{EXT}} (y_i - \hat{y}_i)^2}{\sum_{i=1}^{n_{EXT}} (y_i - \bar{y}_{EXT})^2}$$

Where,  $y_i$  are the observed values of the response,  $\bar{y}$  the corresponding average,  $\hat{y}$  are the calculated values

$$Q_{F3}^2 = 1 - \frac{[\sum_{i=1}^{n_{EXT}} (y_i - \hat{y}_i)^2] / n_{EXT}}{[\sum_{i=1}^{n_{TR}} (y_i - \bar{y}_{TR})^2] / n_{TR}}$$

Where,  $y_i$  are the observed values of the response,  $\bar{y}$  the corresponding average,  $\hat{y}$  are the calculated values

$$CCC = \frac{2 \sum_{i=1}^{n_{EXT}} (y_i - \bar{y})(\hat{y}_i - \bar{y})}{\sum_{i=1}^{n_{EXT}} (y_i - \bar{y})^2 + \sum_{i=1}^{n_{EXT}} (\hat{y}_i - \bar{y})^2 + n_{EXT}(\bar{y} - \bar{y})^2}$$

$$k = \frac{\sum_{i=1}^{n_{EXT}} y_i \hat{y}_i}{\sum_{i=1}^{n_{EXT}} \hat{y}_i^2}$$

$$k' = \frac{\sum_{i=1}^{n_{EXT}} y_i \hat{y}_i}{\sum_{i=1}^{n_{EXT}} y_i^2}$$

$$r_m^2 = r^2(1 - \sqrt{r^2 - r_0'^2})$$

$$\overline{r_m^2} = \frac{(r_m^2 + r_m'^2)}{2}$$



$$RMSE = \sqrt{\frac{\sum_{i=1}^{n_{EXT}} (y_i - \hat{y}_i)^2}{n_{EXT}}}$$

Where,  $y_i$  are the observed values of the response,  $\bar{y}$  the corresponding average,  $\hat{y}$  are the calculated values

$$MAE = \frac{\sum_{i=1}^{n_{EXT}} |y_i - \hat{y}_i|}{n_{EXT}}$$

- **Definitions of the Molecular Descriptors derived from PyDescriptor and appeared in QSAR Model 1.1 and 1.2.**

| Sr. No. | Molecular Descriptor | Definition                                                                                                      |
|---------|----------------------|-----------------------------------------------------------------------------------------------------------------|
| 1       | <b>all_MSA3</b>      | Molecular Surface Area of all atoms having partial charge in the range -0.099 to 0.000                          |
| 2       | <b>com_Splus_7A</b>  | Number of positively charged Sulfur atoms within 7Å from center of mass of molecule                             |
| 3       | <b>fHringC4B</b>     | Frequency of occurrence of ring carbons which are present exactly at 4 bonds from hydrogen atom                 |
| 4       | <b>fOH5B</b>         | Frequency of occurrence of number of hydrogen atoms which are present exactly at 5 bonds from Oxygen atom       |
| 5       | <b>fringNC8B</b>     | Frequency of occurrence of number of carbon atoms which are present exactly at 8 bonds from ring Nitrogen atoms |
| 6       | <b>com_sp2N_2A</b>   | Number of sp2-Nitrogen atoms within 2Å from center of mass of molecule                                          |
| 7       | <b>com_don_6A</b>    | Number of donor atoms within 6Å from center of mass of molecule                                                 |

**Table S5:** Definitions of Molecular Descriptors in QSAR Models.

\*\*\*\*\*
